# Supplementary material for: SRSF1 promotes vascular smooth muscle cell proliferation through a Δ133p53/EGR1/KLF5 pathway
Source: PubMed Central journal article supplement (PMC5561544; doi:10.1038/ncomms16016), 2017-08-11
Supplement: ncomms16016-s1.pdf [file ncomms16016-s1.pdf]

Type of file: PDF

Title of file for HTML: Supplementary Information

Description: Supplementary Figures and Supplementary Tables.

Type of file: PDF

Title of file for HTML: Peer Review File

Description:

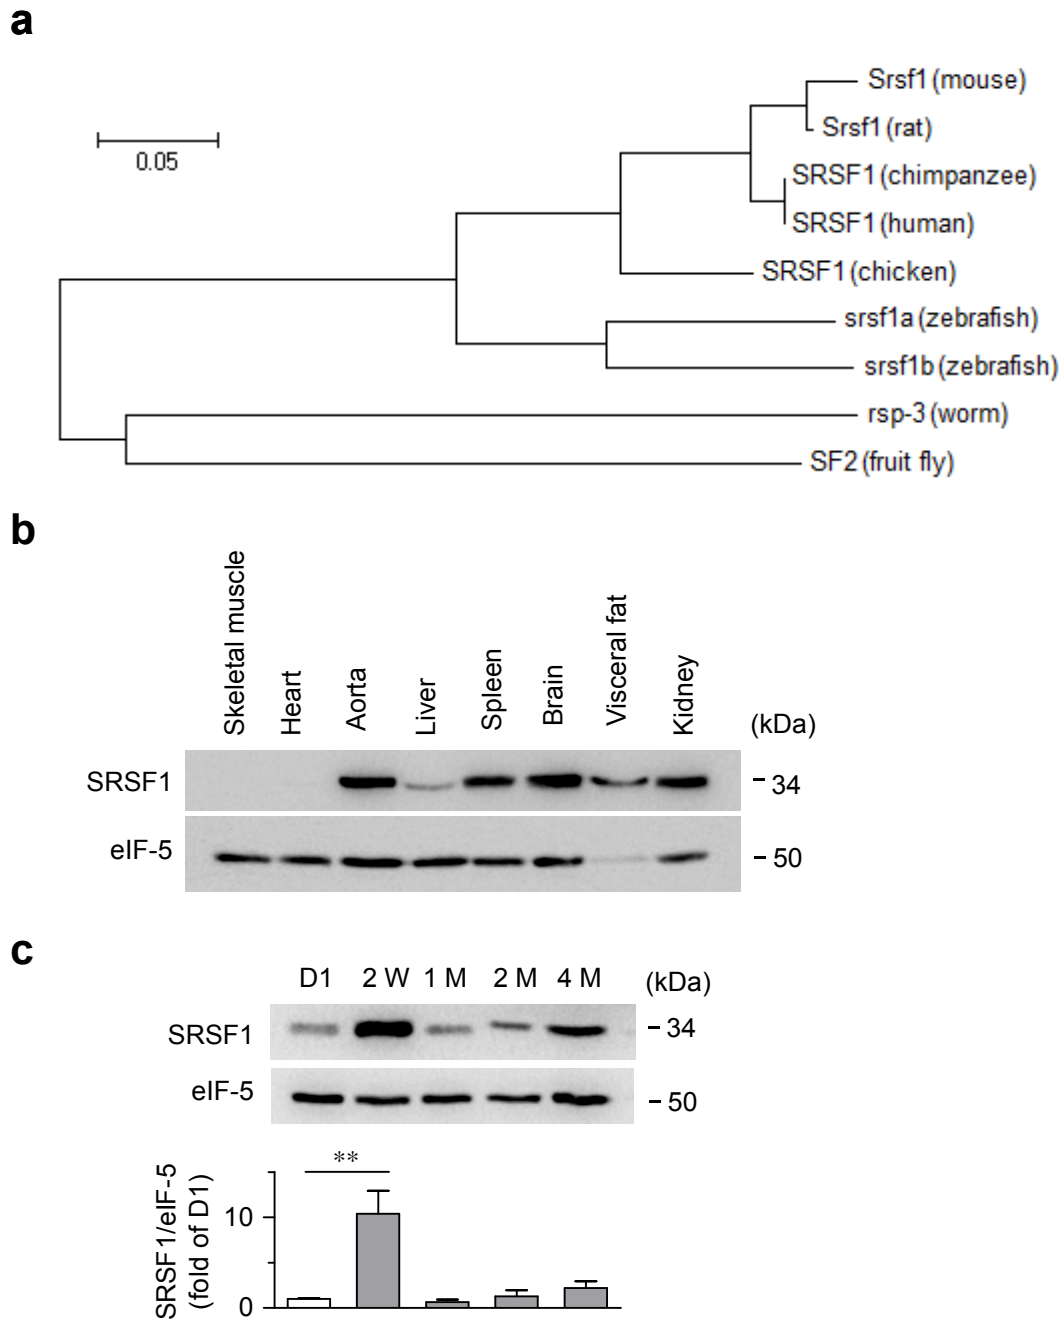

**Supplementary Figure 1 | Expression profile of Srsf1 in aorta.** (a) Molecular phylogenetic tree of SRSF1 in selected model organisms. The branch length shows the distance as measured by the average nucleotide substitutions per site. (b) Representative western blots showing that SRSF1 is expressed in the aorta in 12-14 week-old rats. (c) Western blots and analysis of aortic SRSF1 expression at birth (D1), two weeks (2 W), one month (1 M), two months (2 M), and four months (4 M) after birth;  $n = 5$  per group. eIF-5 served as internal control.  $**P < 0.01$ , one-way ANOVA (c). Data are mean  $\pm$  s.e.m. of four (c) independent experiments.

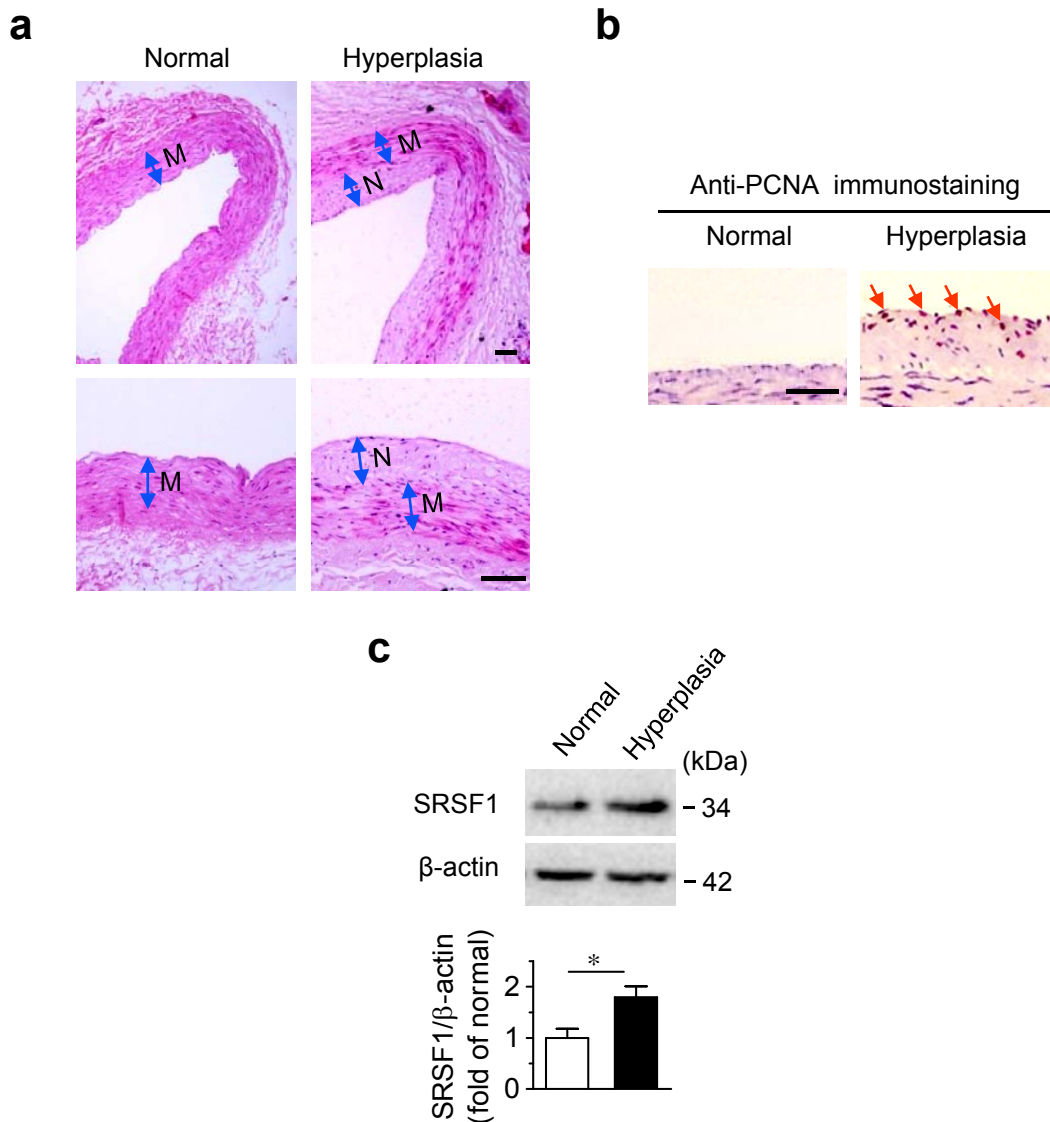

**Supplementary Figure 2 | Increased SRSF1 protein in hyperplasia human artery.** (a) Representative photomicrographs of hematoxylin/eosin staining of the neointima area of human internal mammary arteries (N, neointima; M, media) collected during cardiac bypass surgery ( $\times 100$ ; scale bars, 50  $\mu\text{m}$ ). (b) Representative photomicrographs of immunohistochemical staining showing PCNA-positive cells in a human artery with hyperplasia (scale bar, 25  $\mu\text{m}$ ). Arrows indicate PCNA-positive cells (dark brown). (c) Representative western blots and averaged data showing the SRSF1 levels in human arteries;  $n = 5$  per group.  $*P < 0.05$ , Student's  $t$ -test (c). Data are mean  $\pm$  s.e.m. of three independent experiments (c).

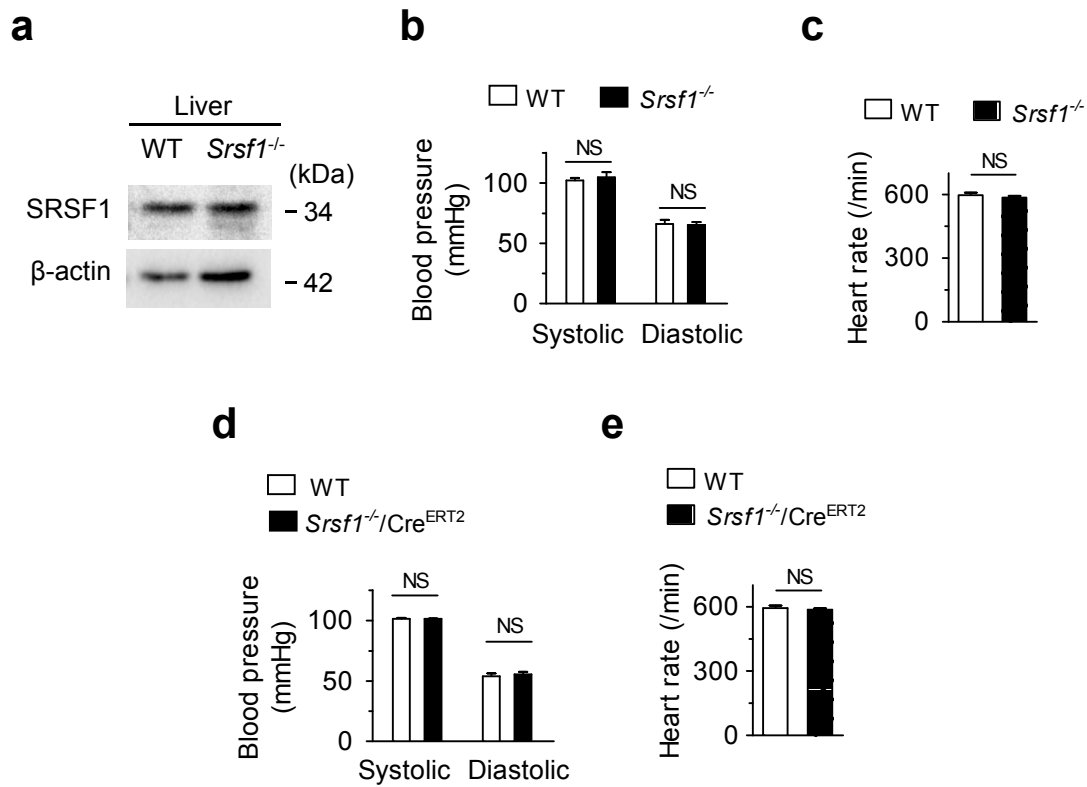

**Supplementary Figure 3 | Genotyping and blood pressure of smooth muscle cell-specific *Srsf1* knockout (*Srsf1*<sup>-/-</sup>) mice and inducible smooth muscle cell-specific *Srsf1* knockout (*Srsf1*<sup>-/-</sup>/Cre<sup>ERT2</sup>) mice. (a) Representative western blots demonstrating the unaltered expression of SRSF1 at the protein level in liver of WT and *Srsf1*<sup>-/-</sup> mice. (b,c) Systolic and diastolic blood pressure (b), and heart rate (c) of WT and *Srsf1*<sup>-/-</sup> mice at 10 weeks of age; *n* = 10 per group. (d,e) Systolic and diastolic blood pressure (d), and heart rate (e) of WT and *Srsf1*<sup>-/-</sup>/Cre<sup>ERT2</sup> at 10 weeks of age; *n* = 12 per group. NS, not significant, Student's *t*-test (b-e).**

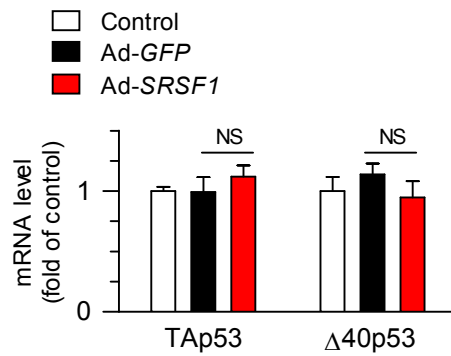

**Supplementary Figure 4 | SRSF1 overexpression did not affect the expression of full-length p53 and Δ40p53.** There are at least 3 subclasses of human p53 isoforms due to N-terminal truncation, TAp53 (N-terminal with completely conserved transactive domain), Δ40p53 (truncated N-terminal missing the first 39 amino-acids), and Δ133p53 (truncated N-terminal missing the first 132 amino-acids). 'Δ40p53' primers qualify the Δ40p53 isoform subclass; 'TAp53' primers qualify the Δ40p53 isoform subclass and the TAp53 isoform subclass (mainly includes full-length p53). Real-time PCR showing the mRNA levels of the TAp53 and Δ40p53 isoforms in HASMCs infected with Ad-GFP or Ad-SRSF1 (m.o.i. 100, 48 h);  $n = 8$  per group. NS, not significant, one-way ANOVA. Data are mean  $\pm$  s.e.m. of four independent experiments.

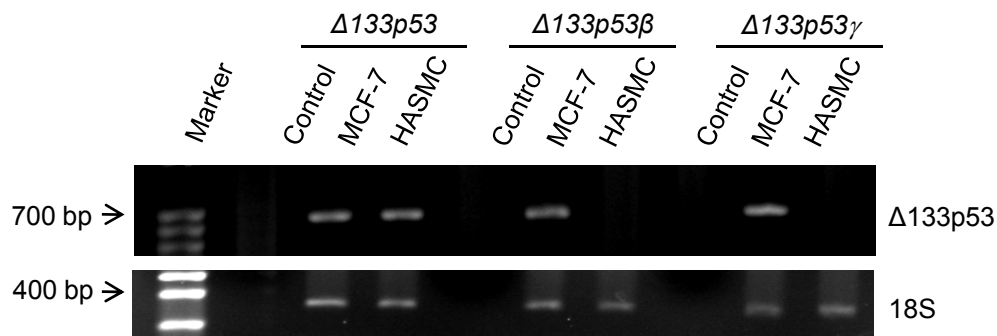

**Supplementary Figure 5 | Amplification of  $\Delta 133p53$  isoform mRNAs by nested PCR in human cells.** MCF-7, human breast adenocarcinoma cell line, positive control; HASMC, human aortic smooth muscle cell; Con, negative control, ddH<sub>2</sub>O was used instead of cDNA. Specific primers were used for amplifying  $\Delta 133p53$  ( $\Delta 133p53\alpha$ ),  $\Delta 133p53\beta$  or  $\Delta 133p53\gamma$  by nested RT-PCR (see Supplementary Tables 6 and 7). PCR products (20  $\mu$ L) were migrated on 1% agarose gel. Marker, 100 bp DNA ladder. DNA sequencing of the bands obtained was performed to verify the isoforms. While all three  $\Delta 133p53$  isoforms ( $\alpha$ ,  $\beta$  and  $\gamma$ ) present in MCF-7 cells, only  $\Delta 133p53\alpha$  was detectable in HASMCs.

```

Mouse Δ157p53 - - - - - MAIYKKSQHMTEVRRCPHHERCSDGDGLAPPQ 33
Human Δ133p53 MFCQLAKTCPVQLWVDSTPPPGTRVRAMAIYKQSQHMTEVRRCPHHERCSDSDGLAPPQ 60

HLIRVEGNLYPEYLEDRQTFRHSVVVPYEPPEAGSEYTTIHYKYMCNSSCMGGMNRRLPIL 93
HLIRVEGNLRVEYLDDRNTFRHSVVVPYEPPEVGSDCTTIHYNKYMCNSSCMGGMNRRLPIL 120

TIITLEDSSGNLLGRDSFEVRVCACPGRRRTEEENFRKKEVLCPELPPGSAKRALPTCT 153
TIITLEDSSGNLLGRNSFEVRVCACPGRRRTEEENLRKKGEPHHELPPGSTKRALPNNT 180

SASPQKKKPLDGEYFTLKIRGRKRFEMFRELNEALELKDAHATEESGDSRAHSSYLKTK 213
SSSPQKKKPLDGEYFTLQIRGRERFEMFRELNEALELKDAQAGKEPGGSRAHSSHLKSK 240

KGQSTSRHKKTMVKKVGPDSD 234
KGQSTSRHKKLMFKTEGPDS 261

```

**Supplementary Figure 6** | Protein alignment between human Δ133p53 and mouse Δ157p53 (named MΔ133p53 in this study) illustrating the high degree of homology between the two protein sequences.

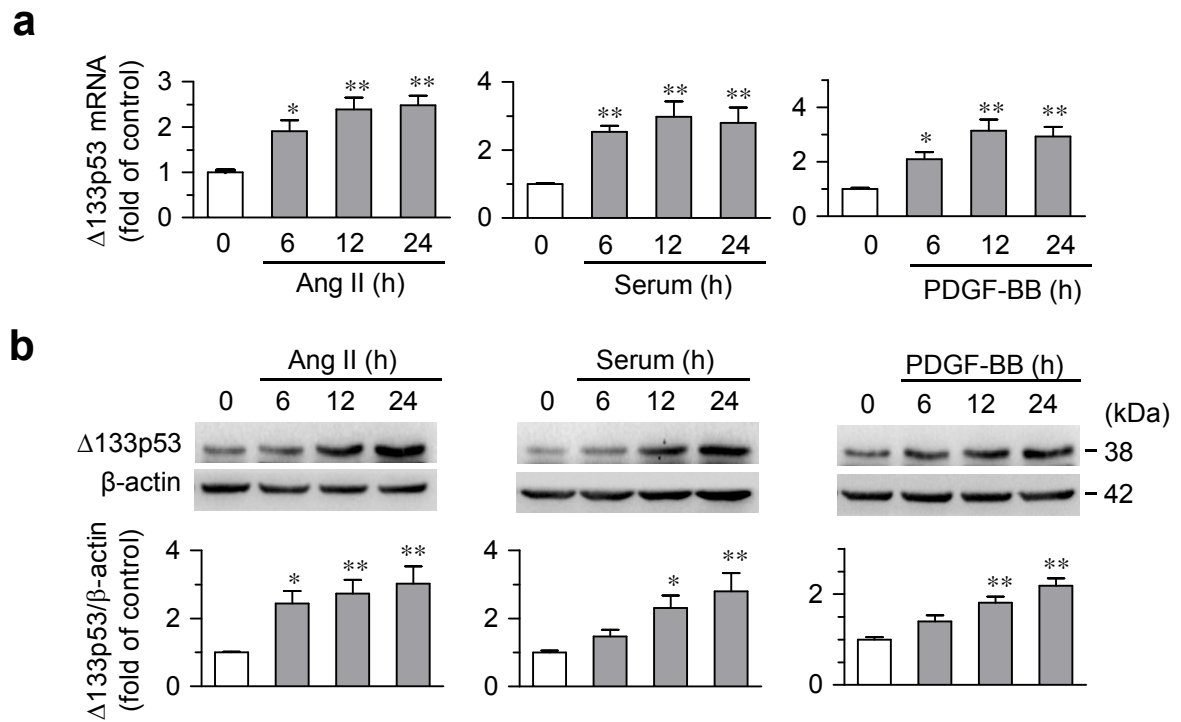

**Supplementary Figure 7 |  $\Delta 133p53$  expression was increased in proliferating smooth muscle cells.** (a) Real-time PCR data showing the mRNA levels of  $\Delta 133p53$  in HASMCs treated with Ang II (200 nM), serum (10% FBS), or PDGF-BB (10  $\mu\text{g/L}$ ) at 6, 12, and 24 h;  $n = 8$  per group. (b) Representative western blots and averaged data showing the  $\Delta 133p53$  levels in HASMCs treated as in (a);  $n = 7$  per group. \* $P < 0.05$ , \*\* $P < 0.01$  vs control group, one-way ANOVA. Data are mean  $\pm$  s.e.m. of five independent experiments.



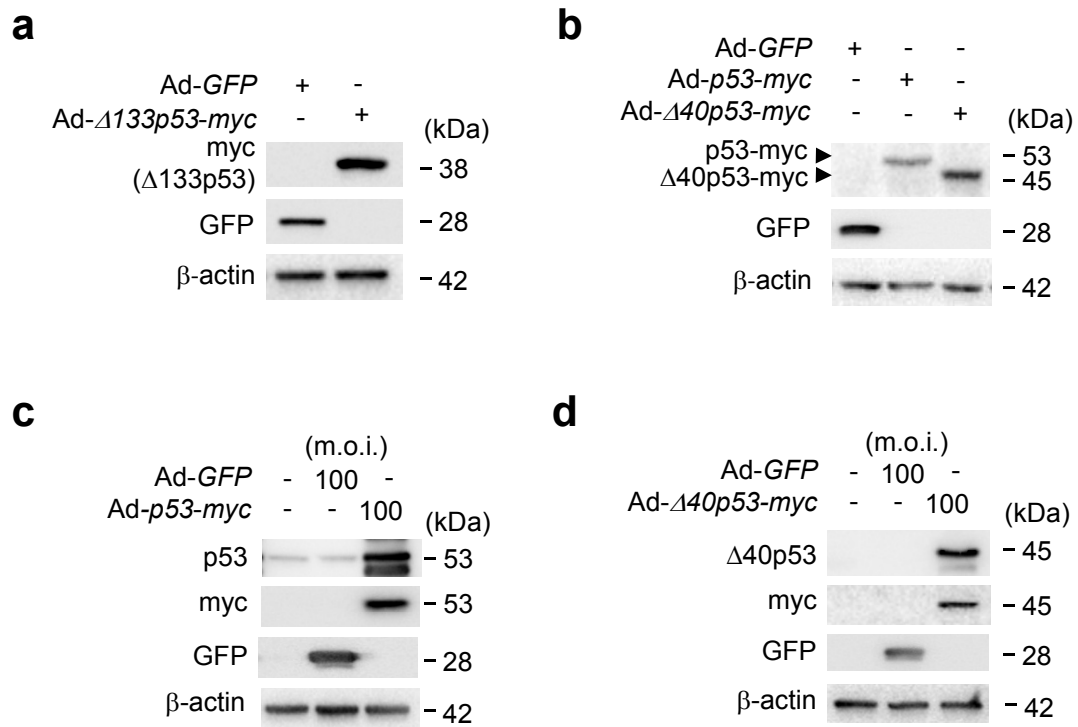

**Supplementary Figure 8** | Representative western blots showing expression of indicated genes in rat carotid arteries at 4 days after Ad- $\Delta 133p53$ -myc (**a**), Ad- $p53$ -myc or Ad- $\Delta 40p53$ -myc (**b**) delivery ( $n = 5$  per group). (**c,d**) Representative western blots showing the p53 (**c**) or  $\Delta 40p53$  (**d**) expression in cultured HASMCs infected with Ad-GFP, Ad- $p53$ , or Ad- $\Delta 40p53$  for 48 h (m.o.i. 100,  $n = 5$  per group).

**a**

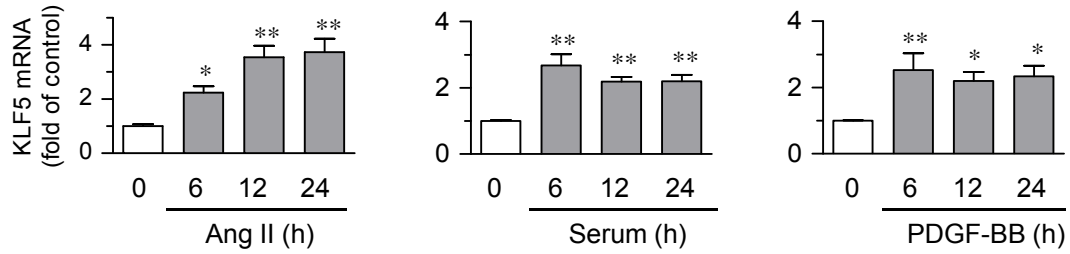

**b**

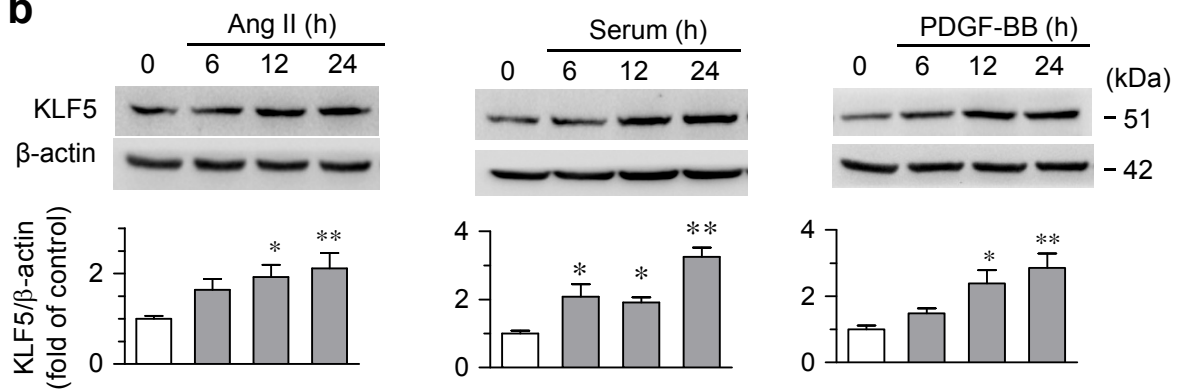

**Supplementary Figure 9 | KLF5 expression was increased in proliferating smooth muscle cells.** (a) Real-time PCR data showing the mRNA levels of KLF5 in HASMCs treated with Ang II (200 nM), serum (10% FBS), or PDGF-BB (10  $\mu\text{g L}^{-1}$ ) at 6, 12, and 24 h;  $n = 8$  per group. (b) Representative western blots and averaged data showing KLF5 levels in HASMCs treated as in (a);  $n = 7$  per group. \* $P < 0.05$ , \*\* $P < 0.01$  vs control group, one-way ANOVA. Data are mean  $\pm$  s.e.m. of four independent experiments.

**a**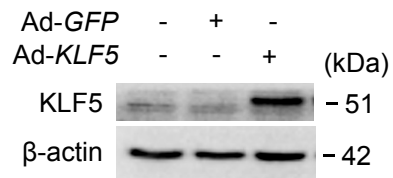**b**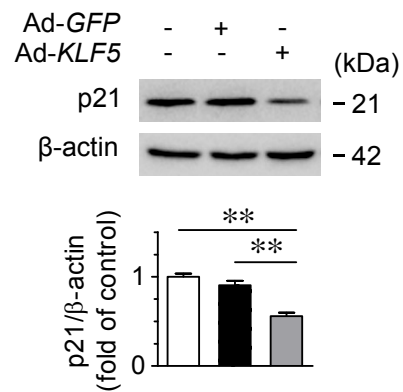

**Supplementary Figure 10 | KLF5 decreased p21 expression.** (a) Representative western blots showing the KLF5 expression in HASMCs infected with Ad-GFP or Ad-KLF5 (m.o.i. 100, 48 h) ( $n = 5$  per group). (b) Representative western blots and averaged data showing p21 levels in HASMCs treated as in (a);  $n = 5$  per group.  $**P < 0.01$ , one-way ANOVA (b). Data are mean  $\pm$  s.e.m. of four independent experiments.

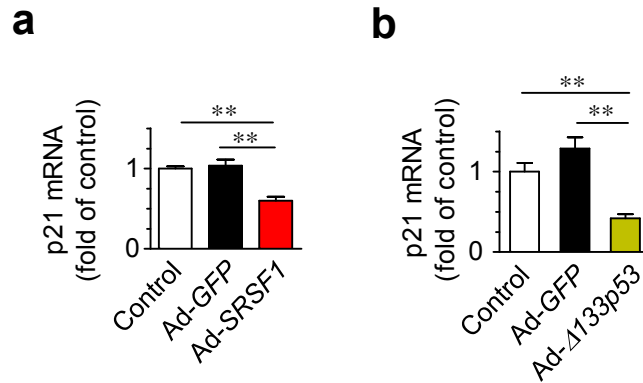

**Supplementary Figure 11 | Overexpression of SRSF1 or Δ133p53 decreased p21 expression.** (a) Real-time PCR data showing the mRNA levels of p21 in HASMCs infected with Ad-SRSF1;  $n = 7$  per group. (b) Real-time PCR data showing the mRNA levels of p21 in HASMCs infected with Ad-Δ133p53;  $n = 12$  per group.  $**P < 0.01$ , one-way ANOVA. Data are mean  $\pm$  s.e.m. of five independent experiments.

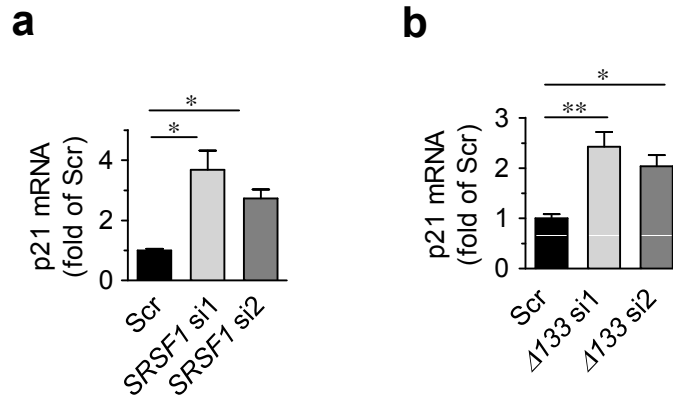

**Supplementary Figure 12 | Knockdown of SRSF1 or Δ133p53 increased p21 expression.** (a) Real-time PCR data showing the mRNA levels of p21 in HASMCs infected with scrambled or *SRSF1* siRNAs (*SRSF1* si1 and *SRSF1* si2);  $n = 8$  per group. (b) Real-time PCR data showing the mRNA levels of p21 in HASMCs infected with scrambled or  $\Delta 133p53$  siRNAs ( $\Delta 133$  si1 and  $\Delta 133$  si2);  $n = 7$  per group. Scr indicates scrambled siRNA control.  $*P < 0.05$ ,  $**P < 0.01$ , one-way ANOVA. Data are mean  $\pm$  s.e.m. of five independent experiments.

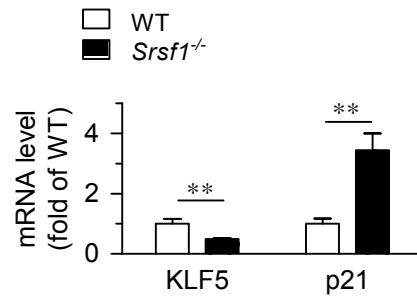

**Supplementary Figure 13** | Real-time PCR data showing the mRNA levels of KLF5 and p21 in arteries from WT and *Srsf1*<sup>-/-</sup> mice; *n* = 8 per group. \*\**P* < 0.01, Student's *t*-test. Data are mean ± s.e.m. of three independent experiments.

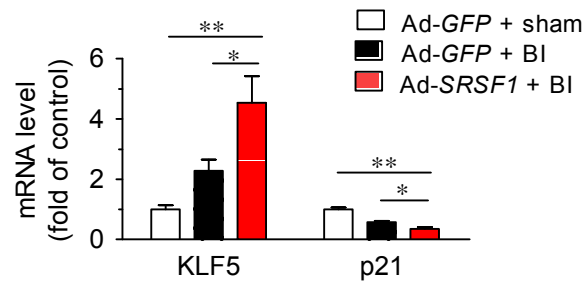

**Supplementary Figure 14** | Real-time PCR data showing the mRNA levels of KLF5 and p21 in rat carotid arteries transfected with Ad-GFP or Ad-SRSF1, one week after balloon injury;  $n = 8/\text{group}$ .  $*P < 0.05$ ,  $**P < 0.01$ , one-way ANOVA. Data are mean  $\pm$  s.e.m. of five independent experiments.

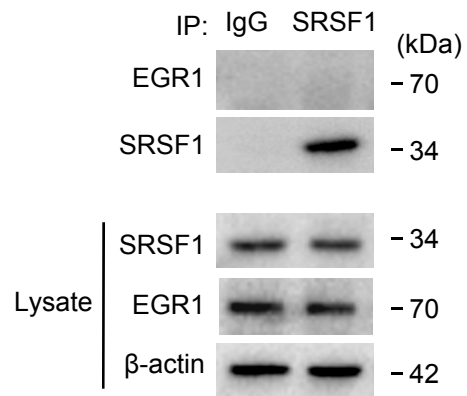

**Supplementary Figure 15** | Representative western blots of co-immunoprecipitation between SRSF1 and EGR1 in HASMCs ( $n = 5$ ).



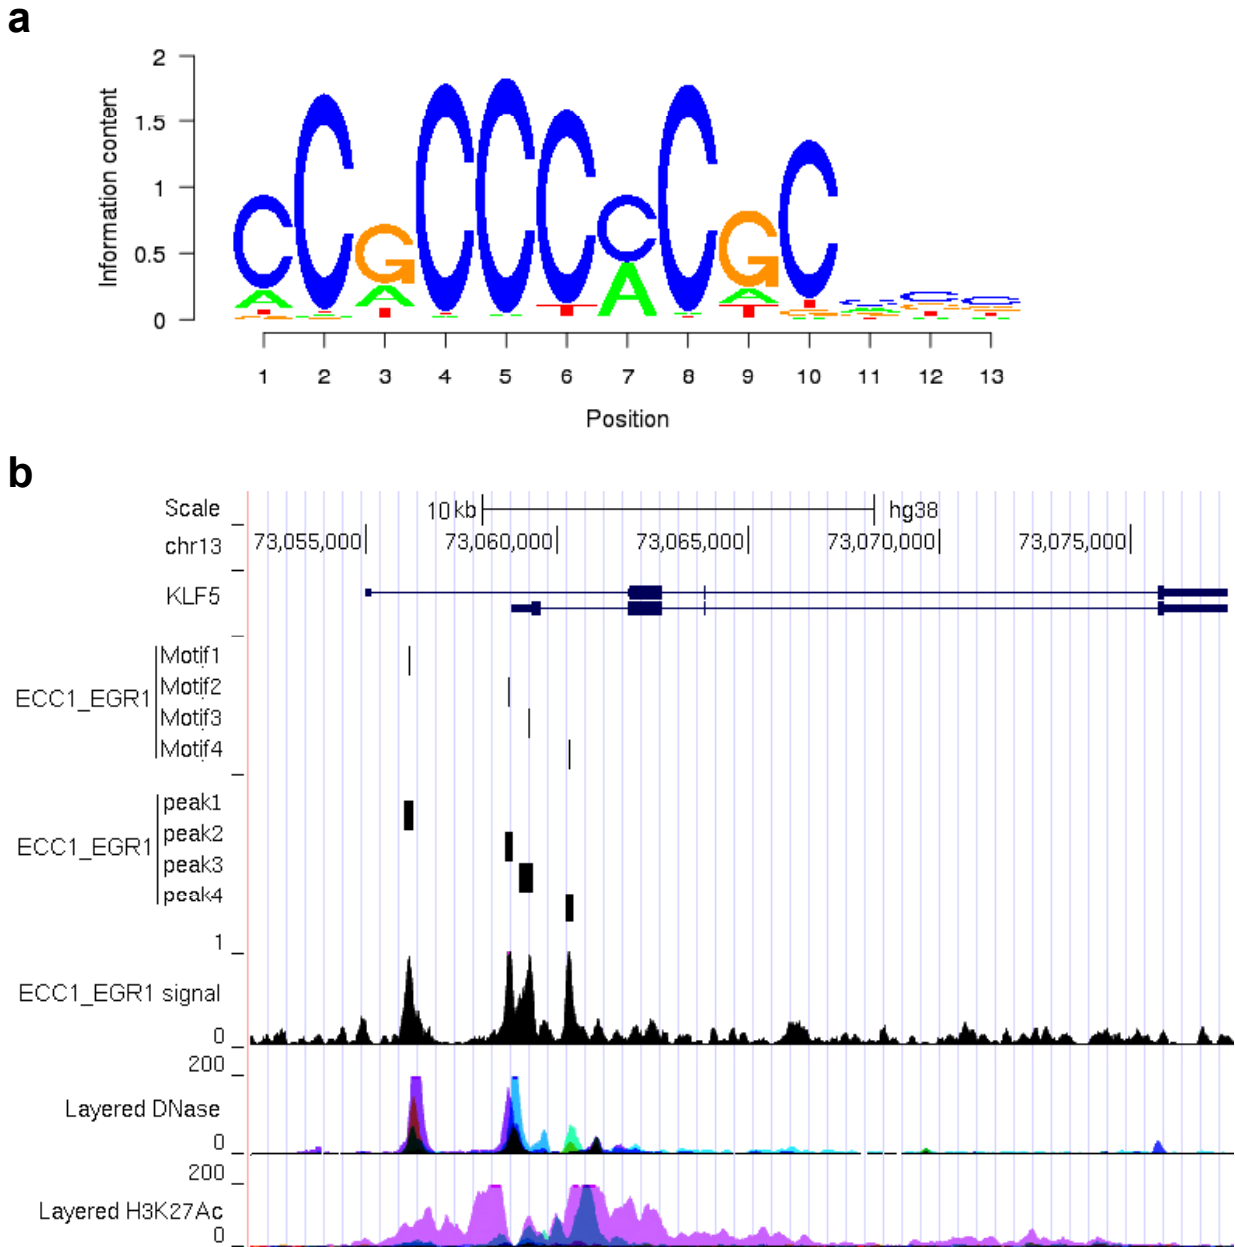

**Supplementary Figure 16 | Annotation of the predicted EGR1 binding sites in the KLF5 gene using the Cistrome data browser. (a)** Sequence logo of the EGR1 binding motif visualized using Cistrome. **(b)** The KLF5 upstream genomic region (chr13:73054976-73077542:GRCh38/hg38) is illustrated using the UCSC genome browser. ChIP-seq signals and peaks of H3K27ac, and DNase-seq peaks were extracted from the Cistrome data. The read density of ChIP-seq signals is indicated in the Y-axis. ChIP-seq peaks of EGR1 in human cell line ECC1 from the Cistrome data and 4 predicted EGR1 binding motifs are indicated.

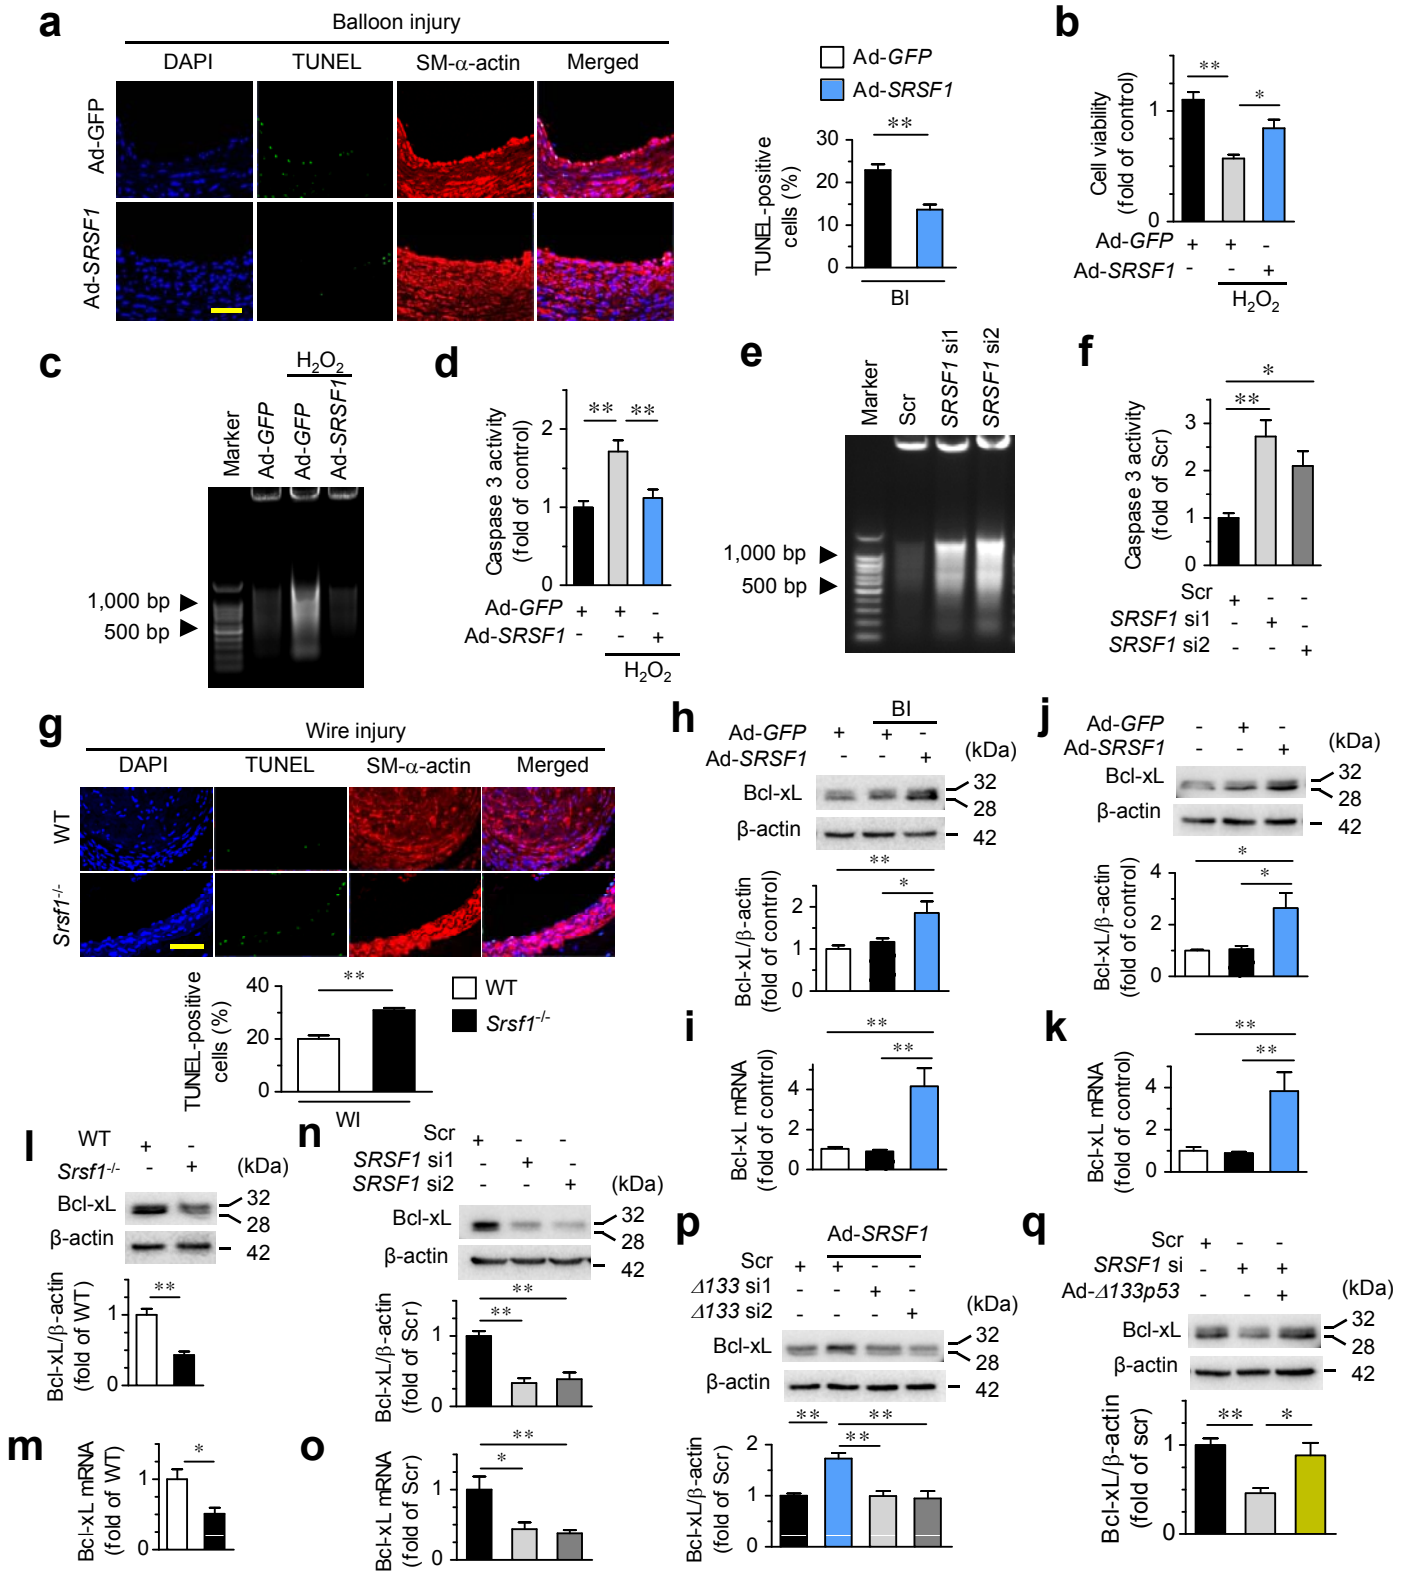

**Supplementary Figure 17 | SRSF1 blockade of apoptosis contributes to neointima formation induced by wire-injury.** (a) Representative photomicrographs (left) and averaged data (right) for TUNEL staining of rat carotid arteries transfected with Ad-GFP or Ad-SRSF1, two weeks after balloon injury; Green, TUNEL-positive VSMC nuclei; blue, DAPI-stained nuclei; red, VSMCs labeled with antibody to SM- $\alpha$ -actin; scale bar, 50  $\mu$ m.  $n = 9$  per group. (b,c,d) Cell viability (b), DNA laddering (c), and caspase 3 activity (d) in HASMCs treated with H<sub>2</sub>O<sub>2</sub> (400  $\mu$ M, 6 h) with or without Ad-SRSF1 overexpression;  $n = 5$  (c) or 9 samples (b,d). (e,f) DNA laddering (e) and caspase 3

activity **(f)** in HASMCs infected with *SRSF1* siRNAs;  $n = 5$  **(e)** or 9 samples **(f)**. **(g)** Representative photomicrographs and averaged data for TUNEL staining of carotid artery sections from WT and *Srsf1*<sup>-/-</sup> mice subjected to wire injury (4 weeks); Green, TUNEL-positive VSMC nuclei; blue, DAPI-stained nuclei; red, VSMCs labeled with antibody to SM- $\alpha$ -actinin; scale bar, 50  $\mu$ m;  $n = 9$  per group. **(h)** Representative western blots and averaged data showing Bcl-xL levels in rat carotid arteries transfected with Ad-*GFP* or Ad-*SRSF1* 4 days after balloon injury;  $n = 6$  per group. **(i)** Real-time PCR data showing the Bcl-xL mRNA in rat carotid arteries transfected with Ad-*GFP* or Ad-*SRSF1*, one week after balloon injury;  $n = 8$  per group. **(j)** Representative western blots and averaged data showing Bcl-xL levels in HASMCs with *SRSF1* overexpression;  $n = 6$  per group. **(k)** Real-time PCR data showing the Bcl-xL levels in HASMCs infected with Ad-*GFP* or Ad-*SRSF1*;  $n = 8$  per group. **(l)** Representative western blots and averaged data showing Bcl-xL levels in arteries from *Srsf1*<sup>-/-</sup> and WT control mice;  $n = 7$  per group. **(m)** Real-time PCR data showing the Bcl-xL levels in aortas from WT and *Srsf1*<sup>-/-</sup> mice;  $n = 8$  per group. **(n)** Representative western blots and averaged data showing KLF5 levels in HASMCs with *SRSF1*-knockdown by *SRSF1* siRNAs;  $n = 5$  per group. **(o)** Real-time PCR data showing the Bcl-xL levels in HASMCs infected with scrambled or *SRSF1* siRNAs;  $n = 8$  per group. **(p)** Representative western blots and averaged data showing the Bcl-xL levels in HASMCs infected with scrambled or  $\Delta$ 133*p53* siRNAs ( $\Delta$ 133 si1 and  $\Delta$ 133 si2) with or without of Ad-*SRSF1* overexpression;  $n = 9$  per group. **(q)** Representative western blots and averaged data showing the Bcl-xL levels in HASMCs infected with scrambled or *SRSF1* siRNA1 (*SRSF1* si) with or without overexpression of Ad- $\Delta$ 133*p53*;  $n = 7$  per group. Scr indicates scrambled siRNA control. BI, balloon injury. WI, wire injury. \* $P < 0.05$ , \*\* $P < 0.01$ , Student's *t*-test **(a,g,l,m)** or one-way ANOVA **(b,d,f,h-k,n-q)**. Data are mean  $\pm$  s.e.m. of three **(m)** or four **(a-g,o)** or five **(h-l,n-q)** independent experiments.

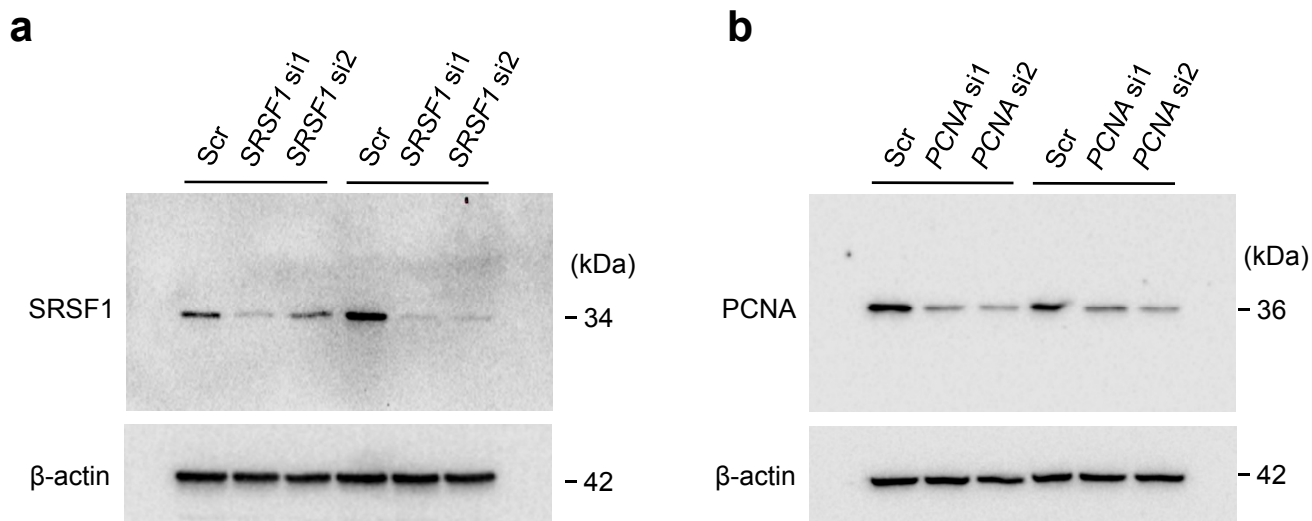

**Supplementary Figure 18 | Knock down of SRSF1 or PCNA in HASMCs.** (a) Representative western blots showing SRSF1 levels in HASMCs with SRSF1-knockdown by *SRSF1* siRNAs. Antibody for SRSF1 from Invitrogen (catalog number 32-4500), recognizes the first 97 amino acids of SRSF1. (b) Representative western blots showing PCNA levels in HASMCs with PCNA-knockdown by *PCNA* siRNAs. Antibody for PCNA from Signaling Technology (catalog number 2586), recognizes the protein region within the amino acid residues 111-125.

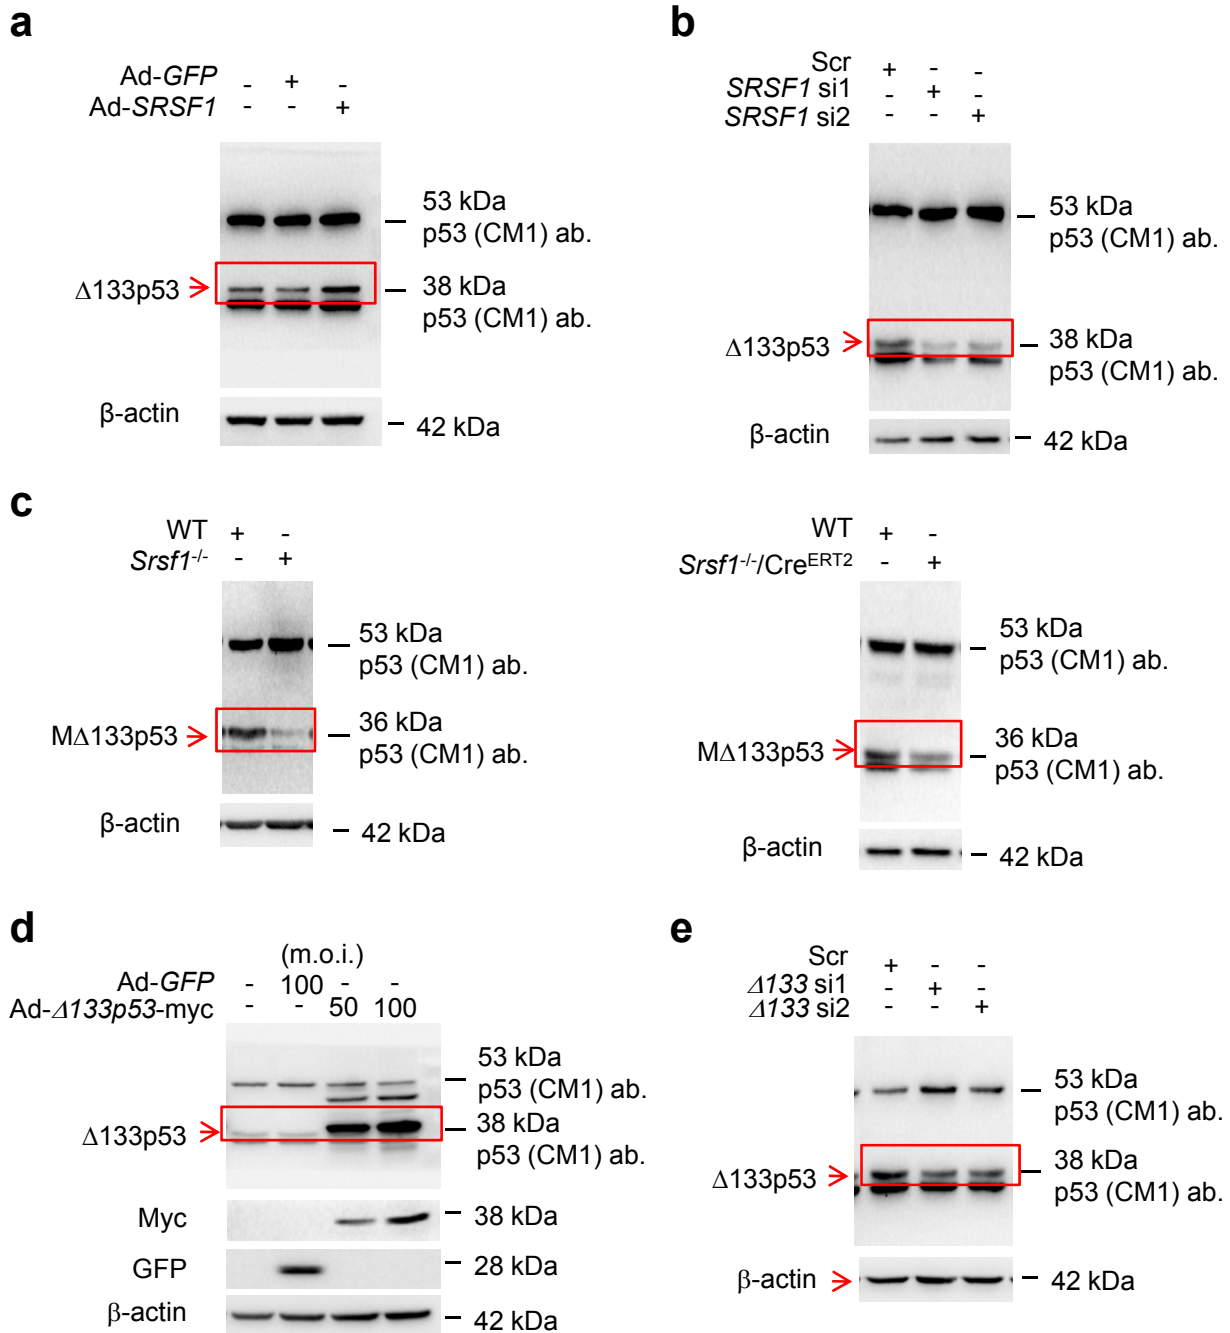

**Supplementary Figure 19 | Representative full-length gels showing all p53 isoforms. (a,b)** Gels for p53 isoforms in HASMCs with SRSF1-overexpression (a) and SRSF1-knockdown by *SRSF1* siRNAs (*SRSF1* si1 and *SRSF1* si2) (b). (c) Gels for p53 isoforms in vessels from *Srsf1*<sup>-/-</sup> and WT control mice at 56 days after birth. (d,e) Gels for p53 isoforms in HASMCs with  $\Delta 133p53$ -overexpression (d) or  $\Delta 133p53$ -knockdown by  $\Delta 133p53$  siRNAs ( $\Delta 133$  si1 and  $\Delta 133$  si2) (e). The antibody we used to detect  $\Delta 133p53$  (and  $\Delta 157p53$ ) was p53 (CM1) antibody (Vector Laboratories, VP-P955), a rabbit polyclonal antibody raised against recombinant full-length human p53 protein that recognizes all p53 isoforms.

Supplementary Figure 20 | Uncropped images of blots in Figure 1-9 and Supplementary Figure 1-19.

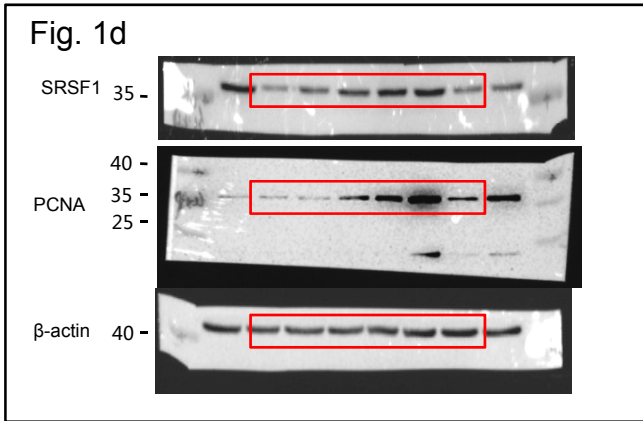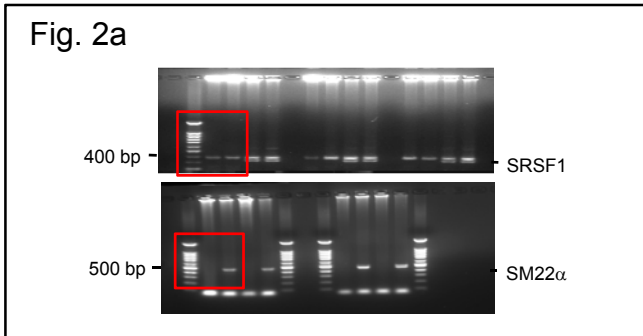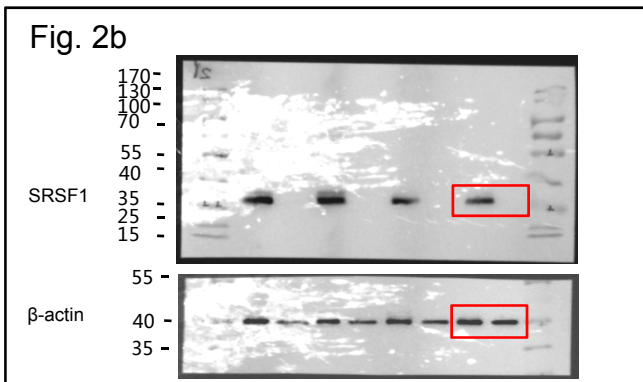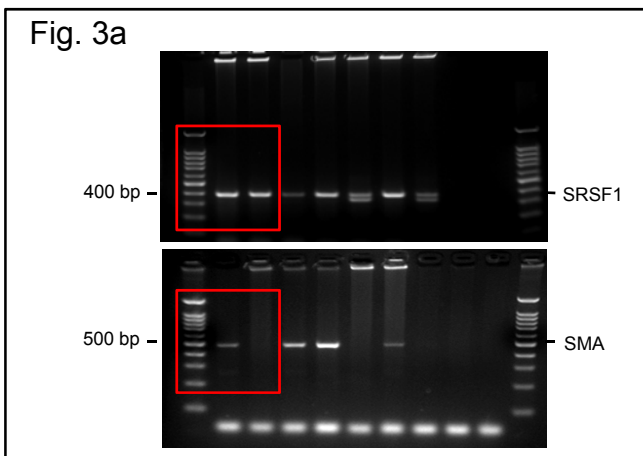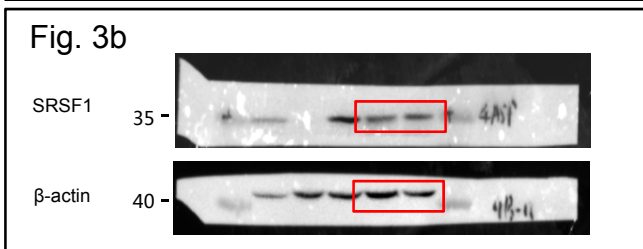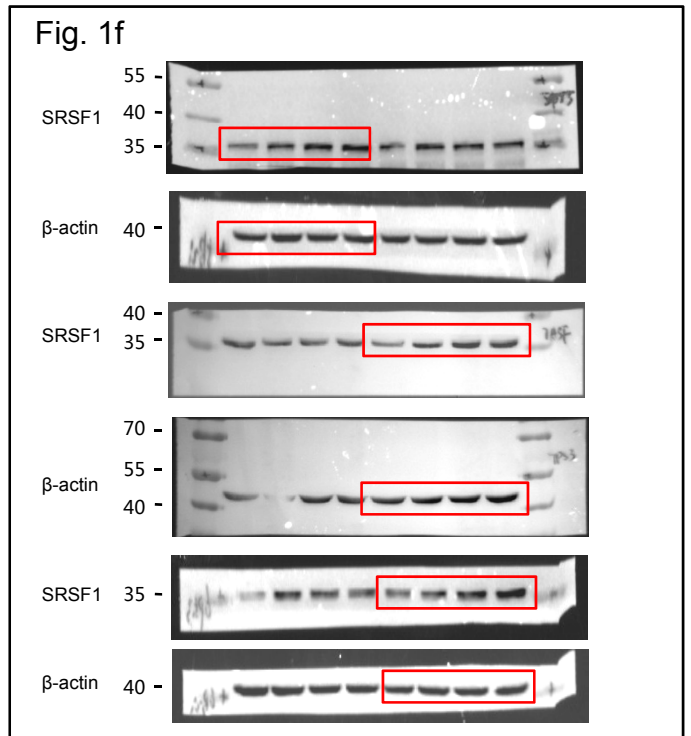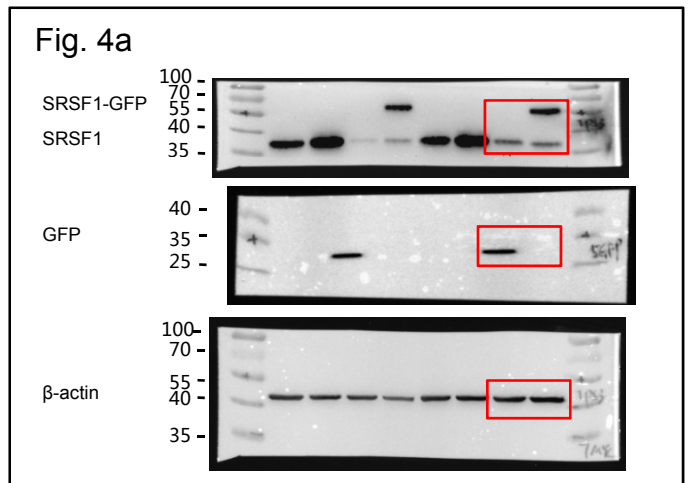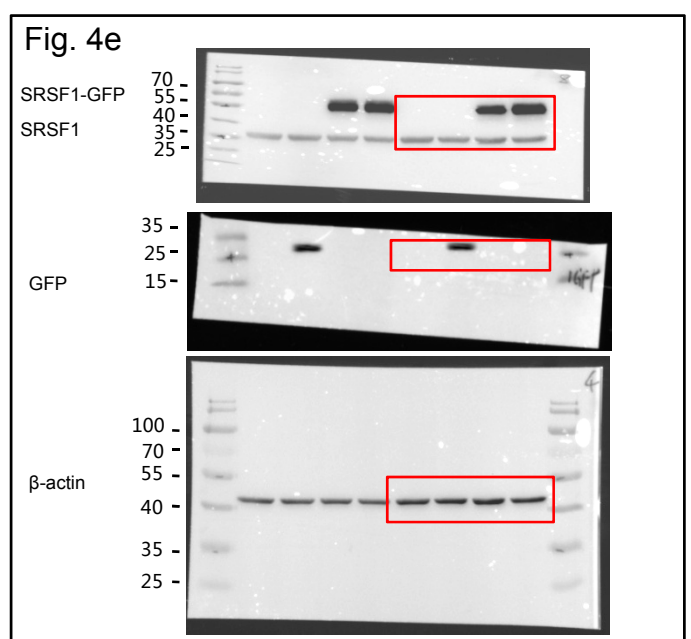

Fig. 4j

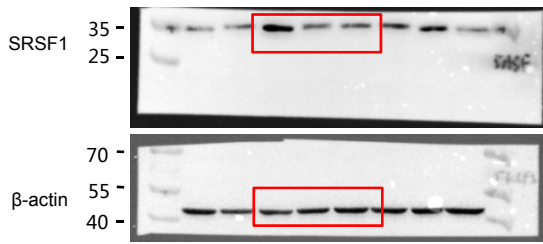

Fig. 4f

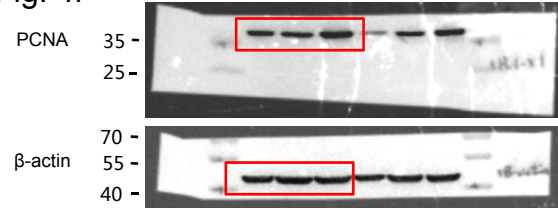

Fig. 5e

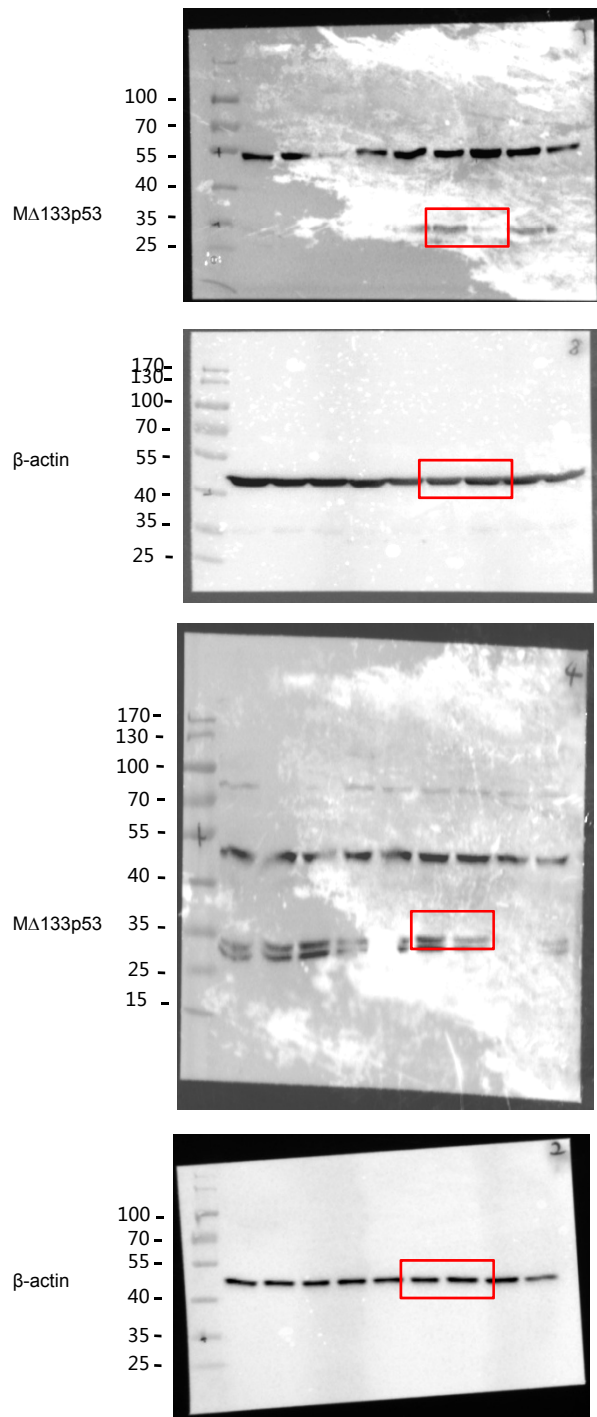

Fig. 4k

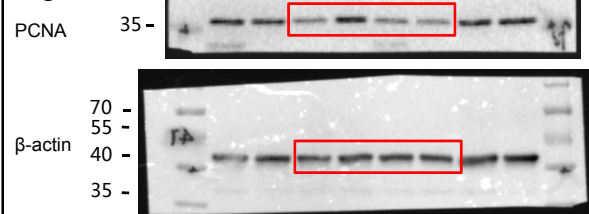

Fig. 5b

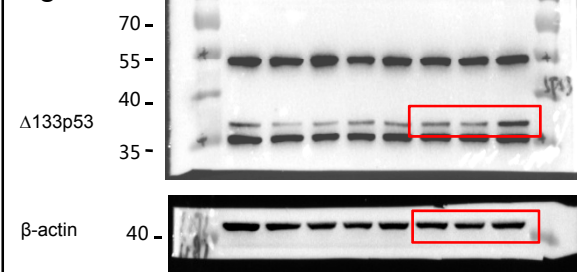

Fig. 5d

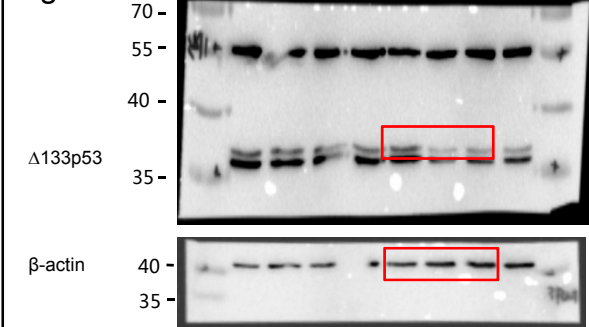

Fig. 5f

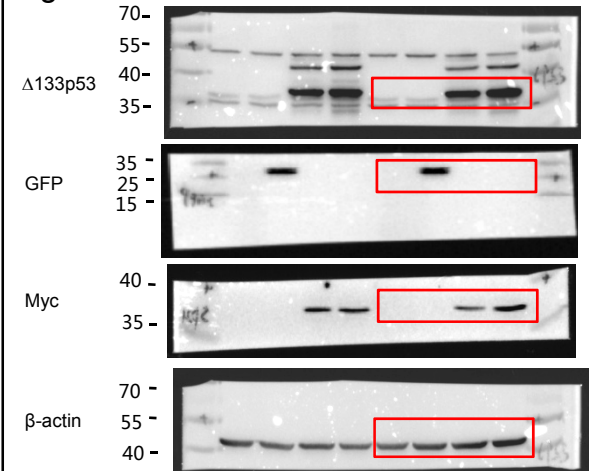

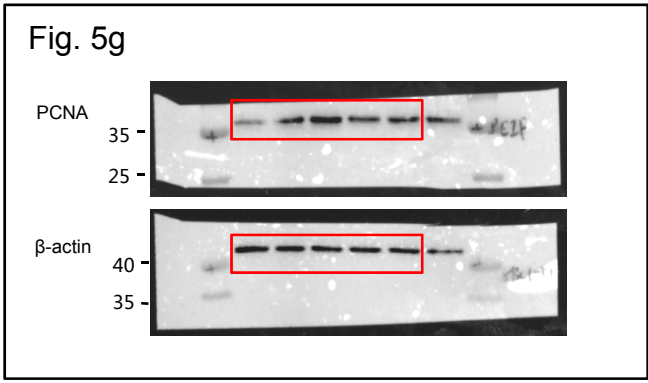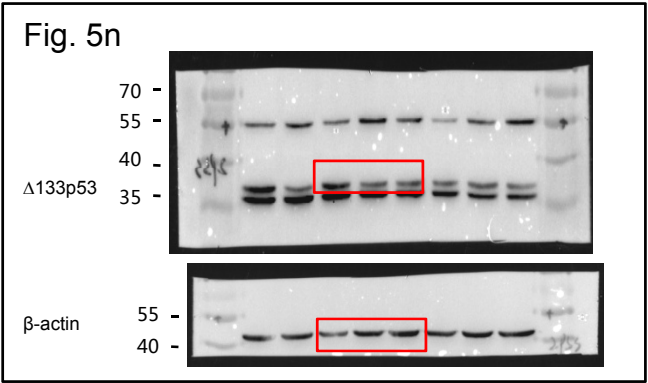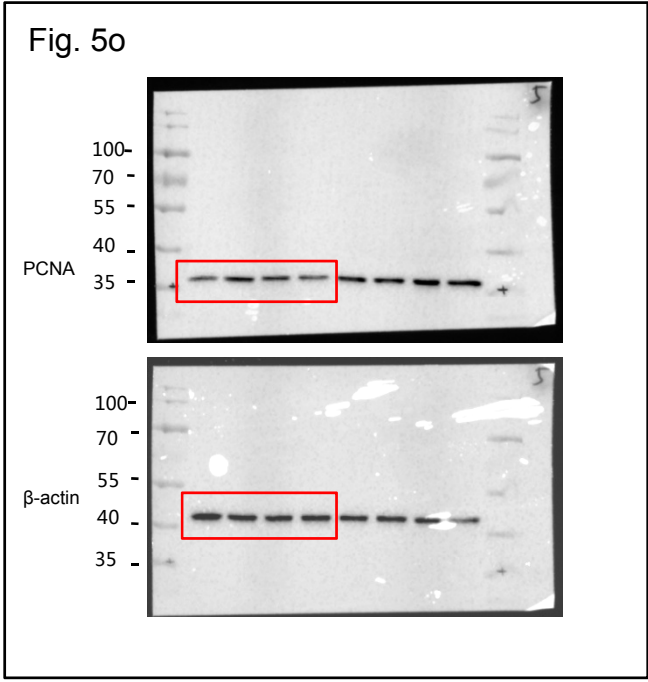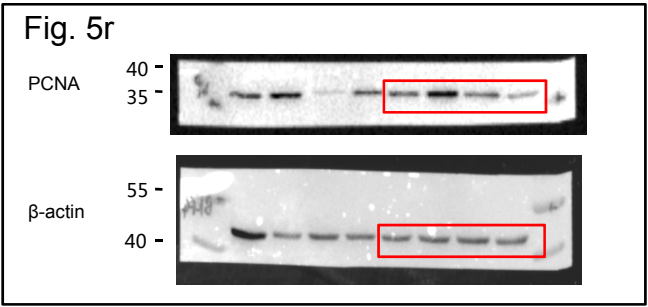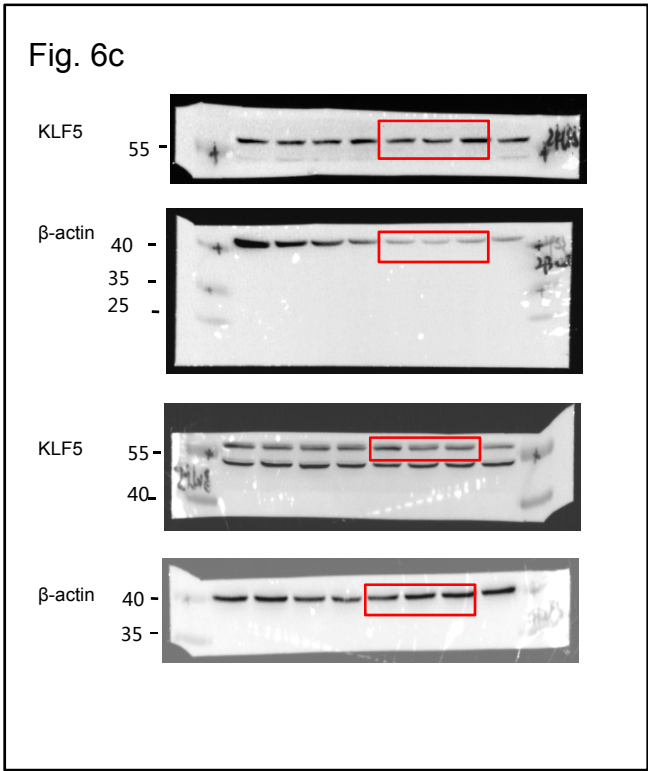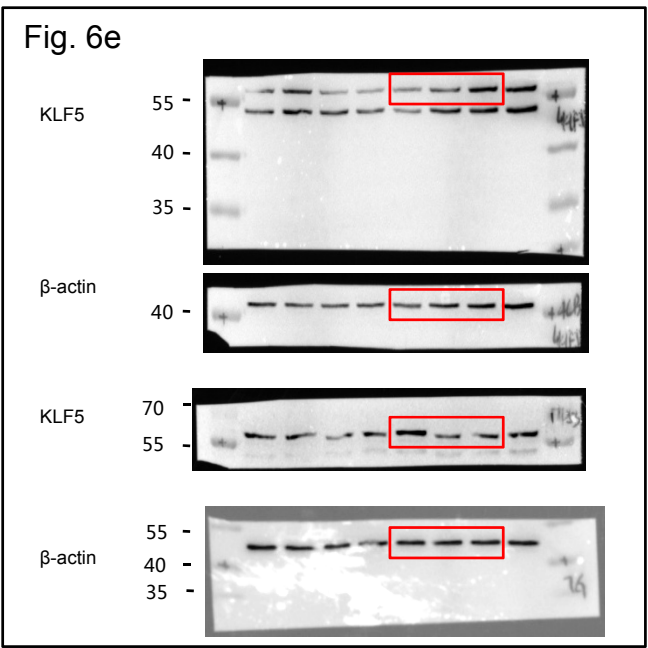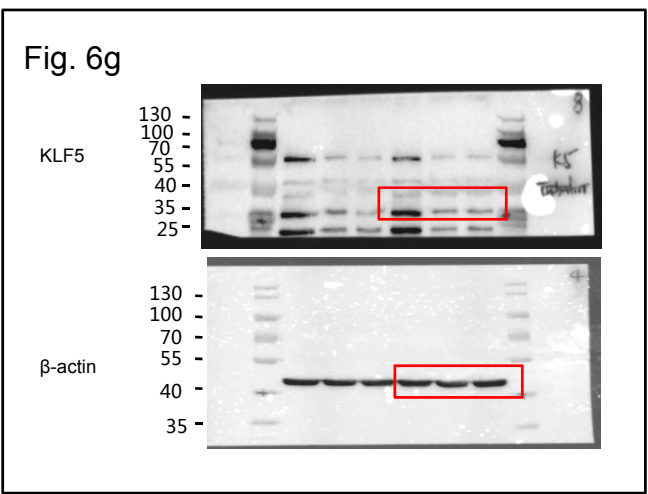



Fig. 6h

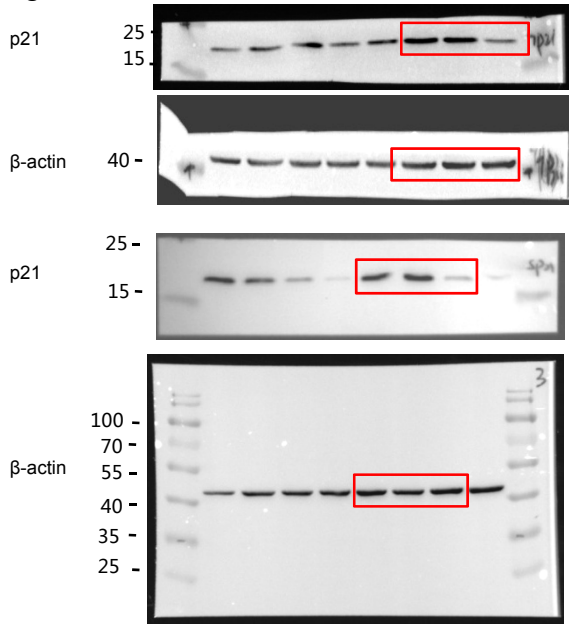

Fig. 6i

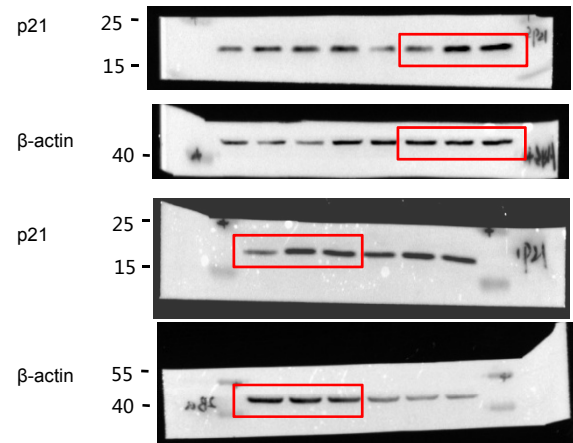

Fig. 6k

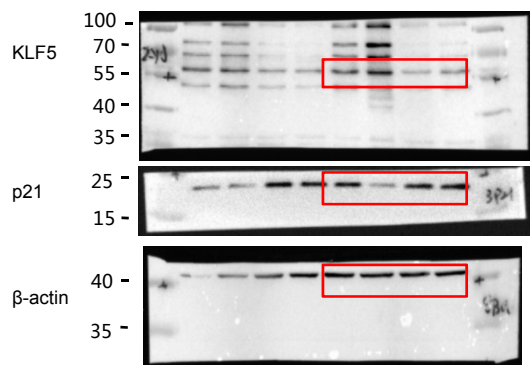

Fig. 6j

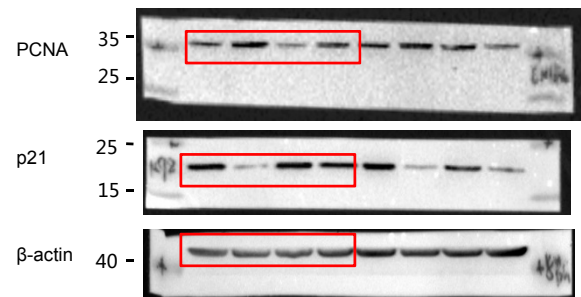

Fig. 6n

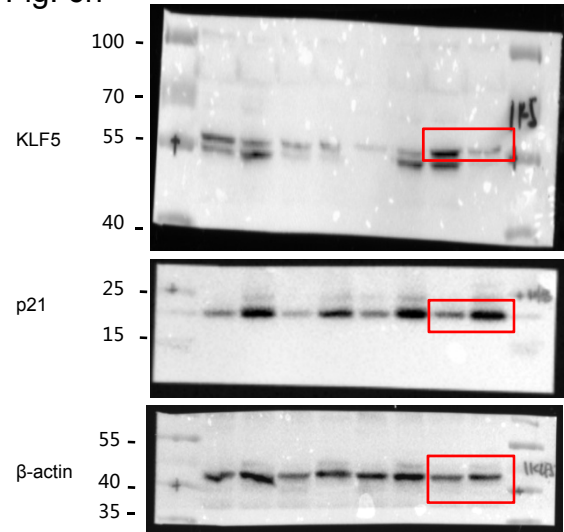

Fig. 6l

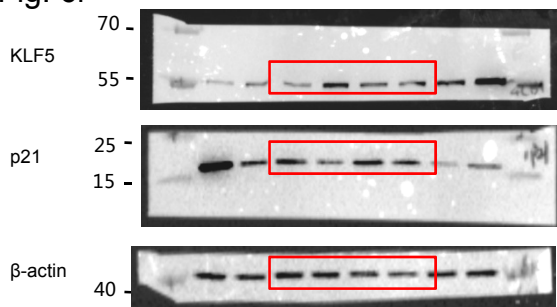

Fig. 6m

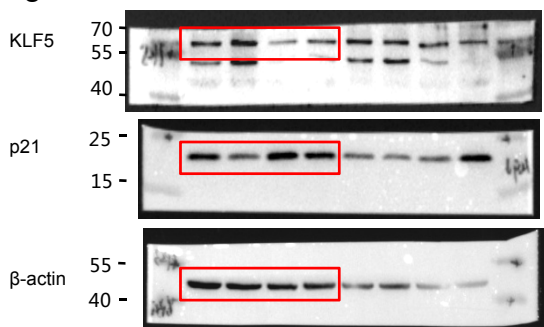

Fig. 6o

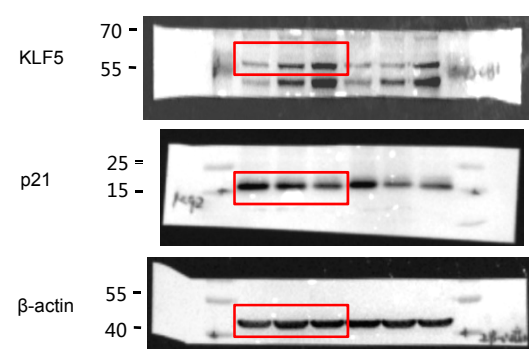

Fig. 7a

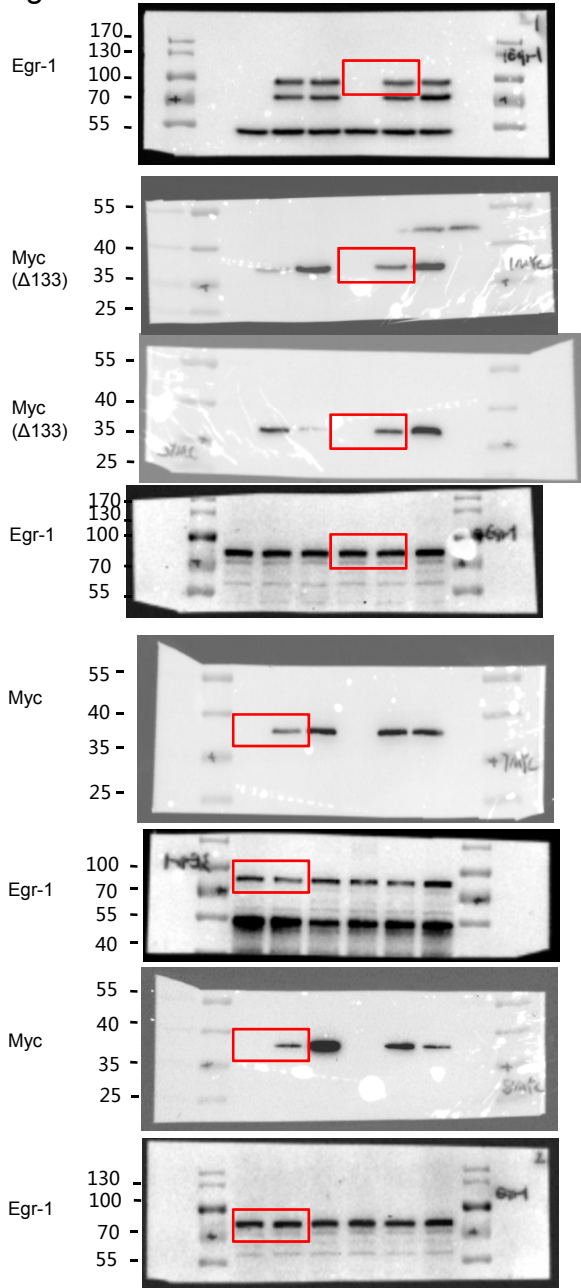

Fig. 7c

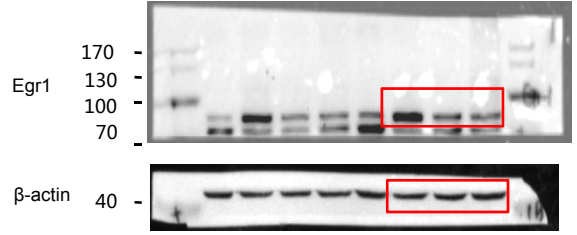

Fig. 7f

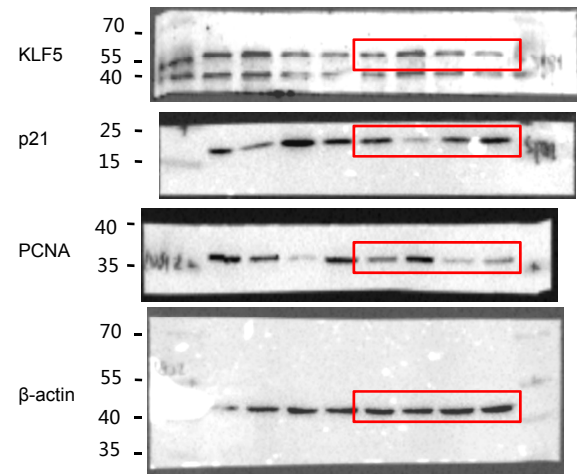

Fig. 8c

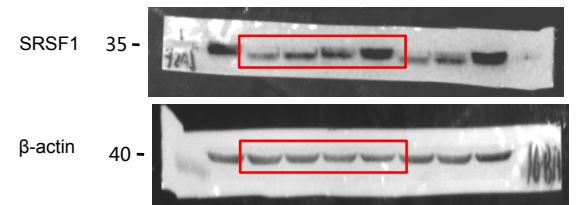

Fig. 7e

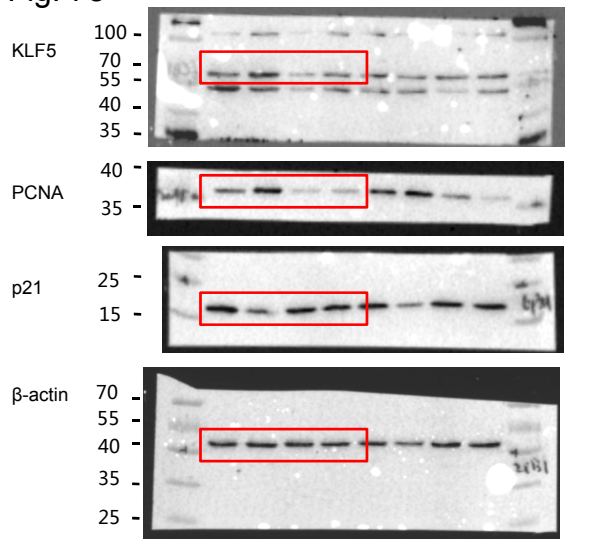

Fig. 8d

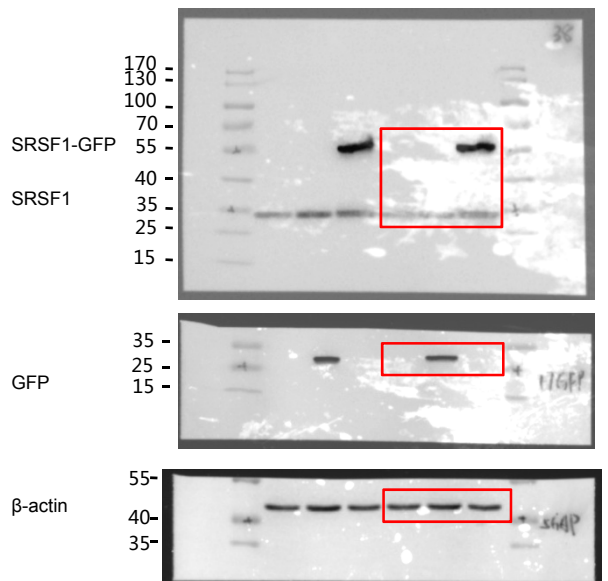

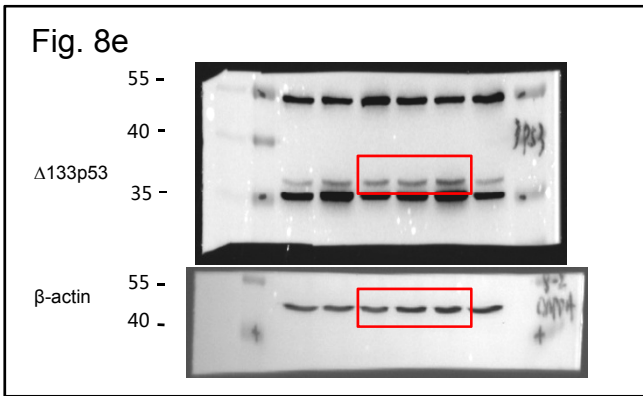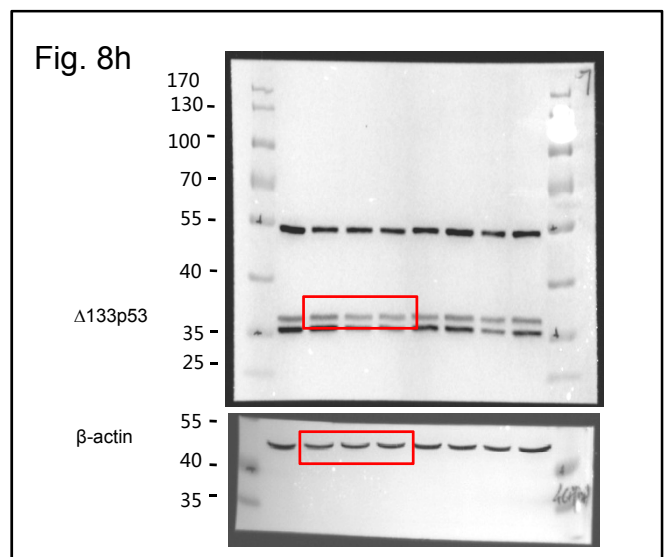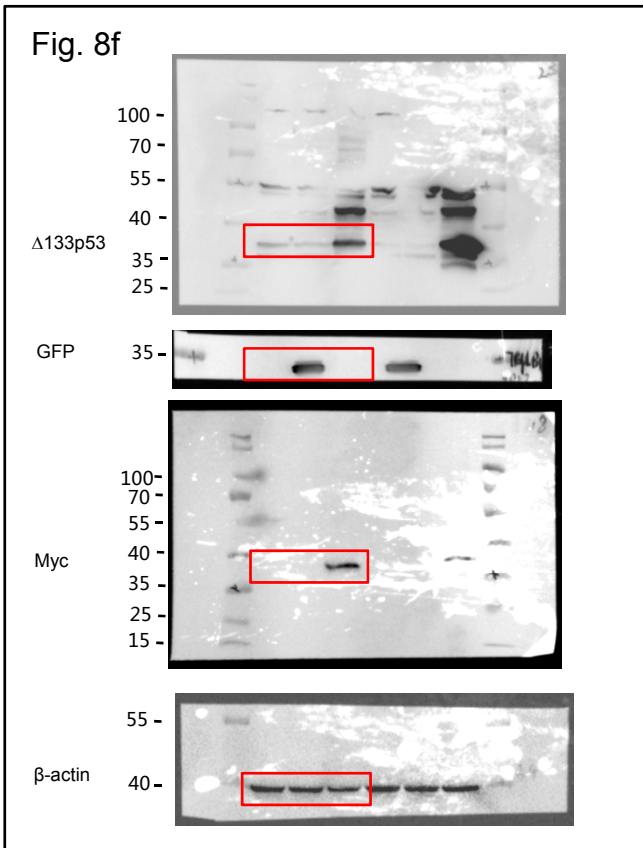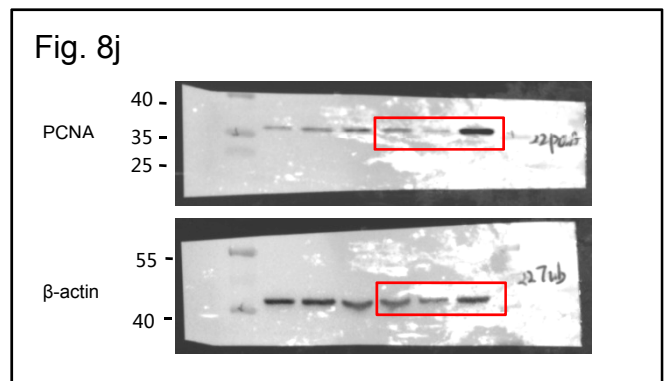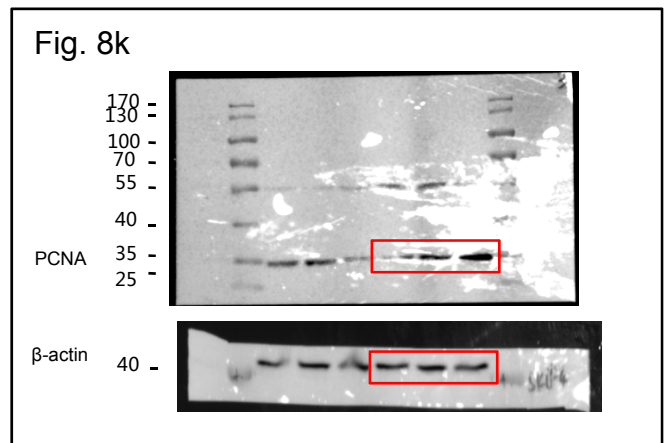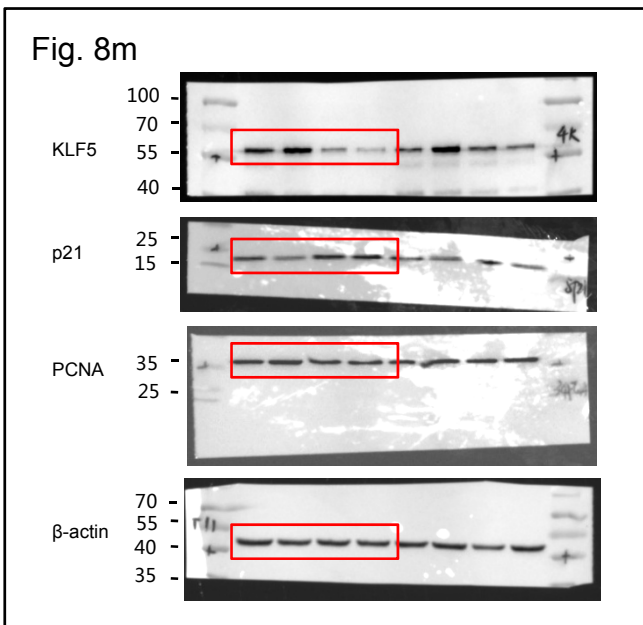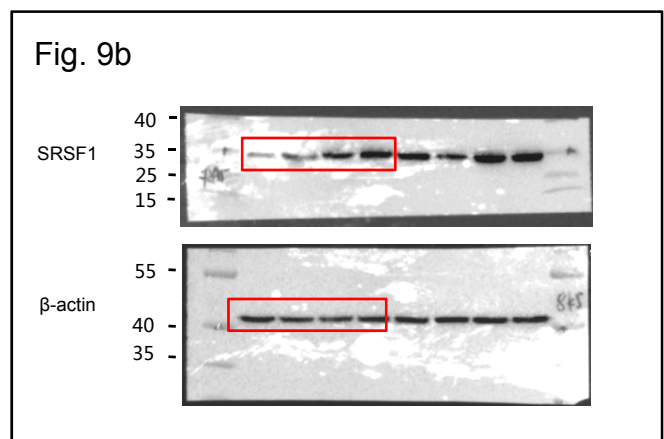

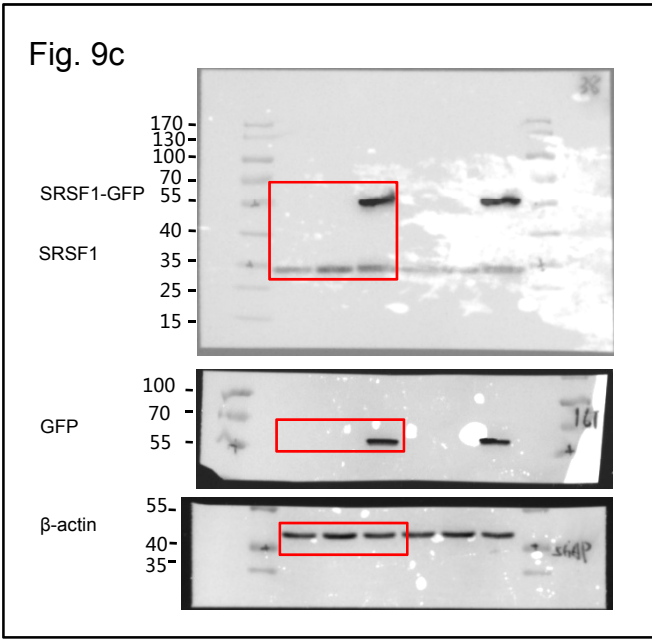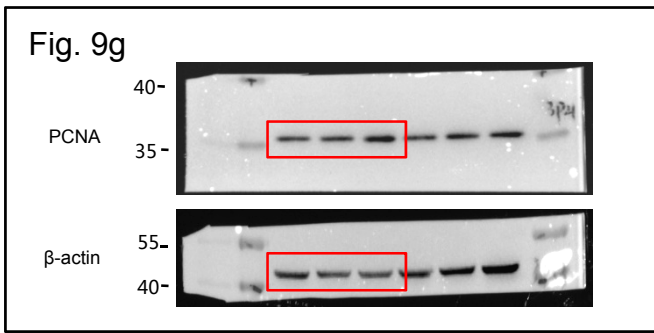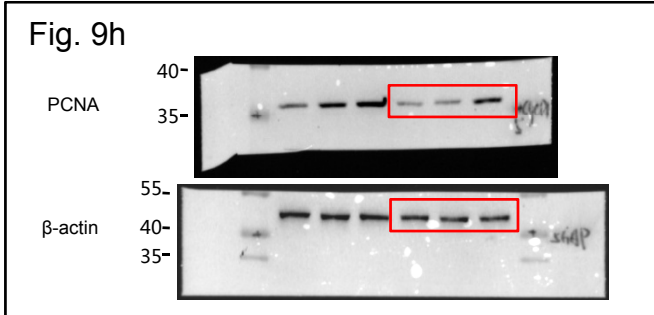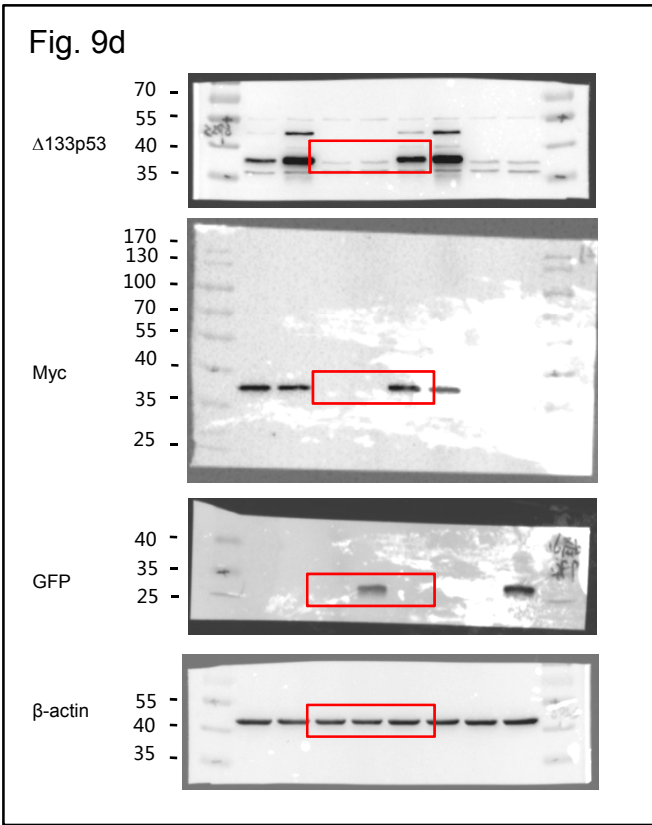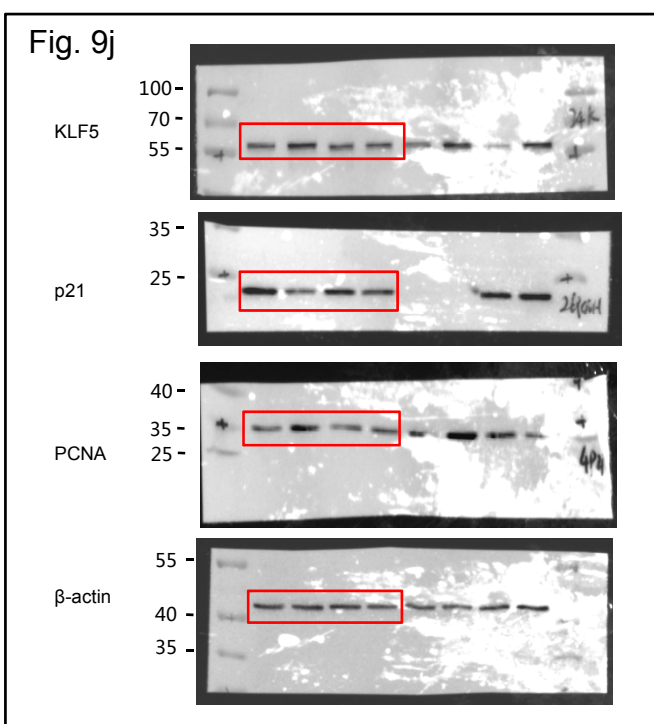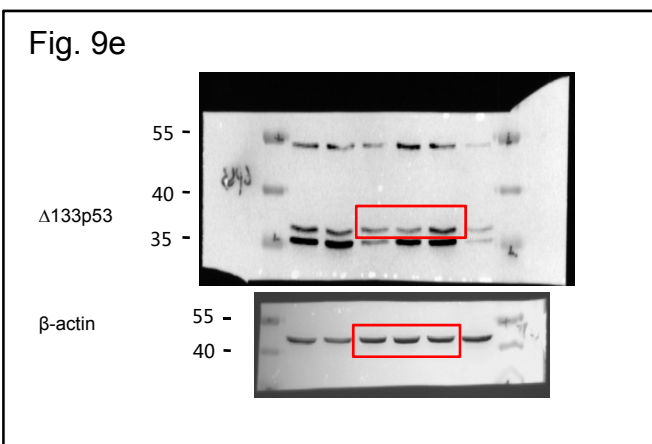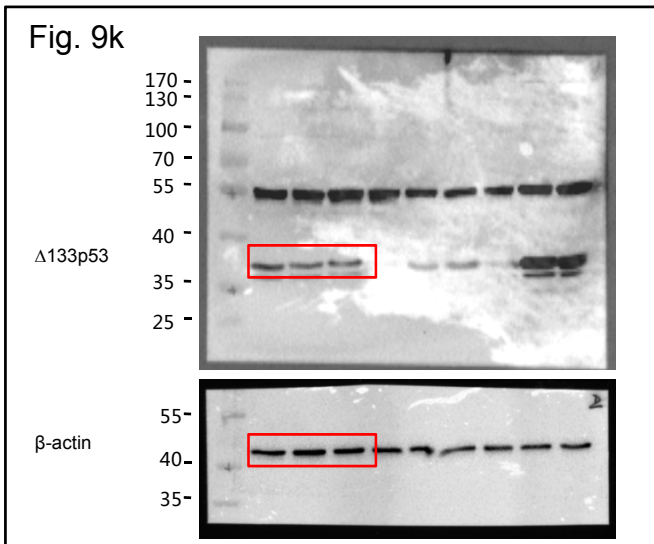

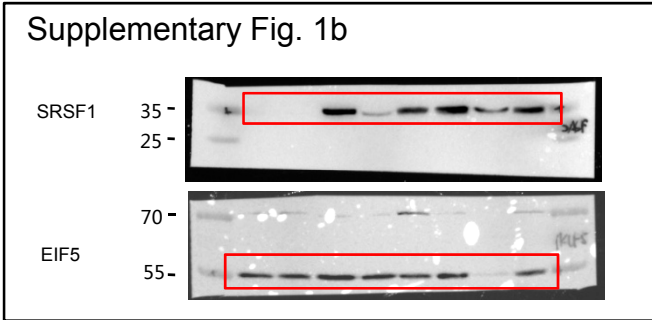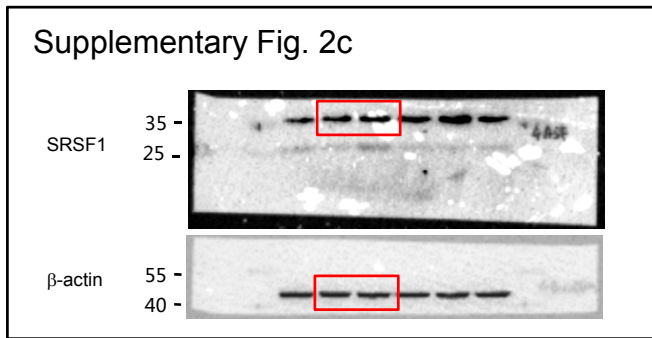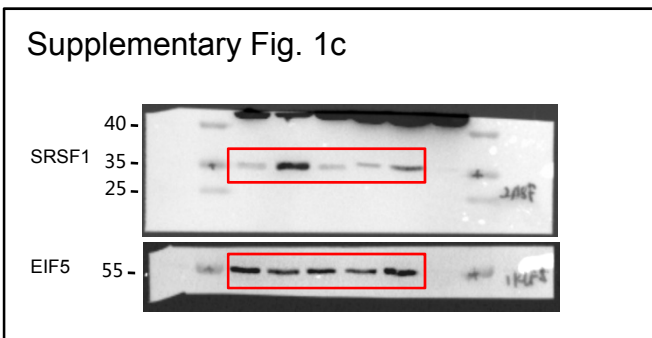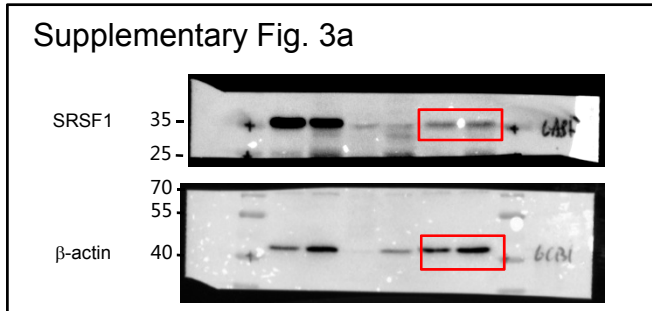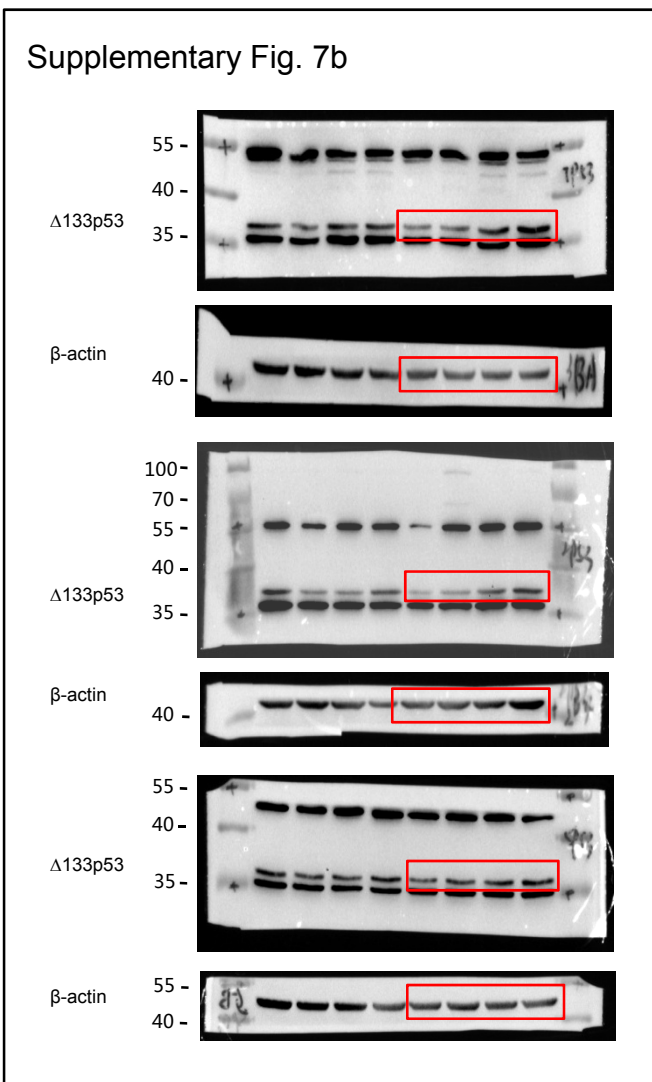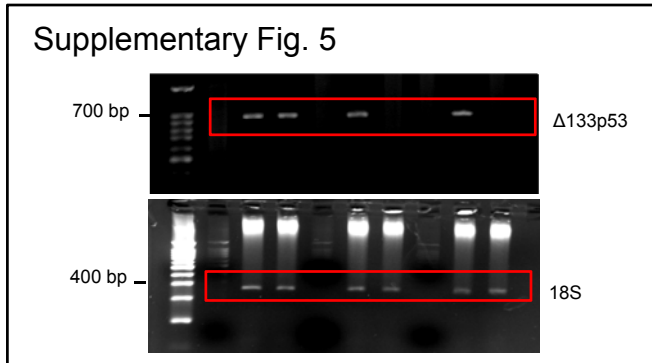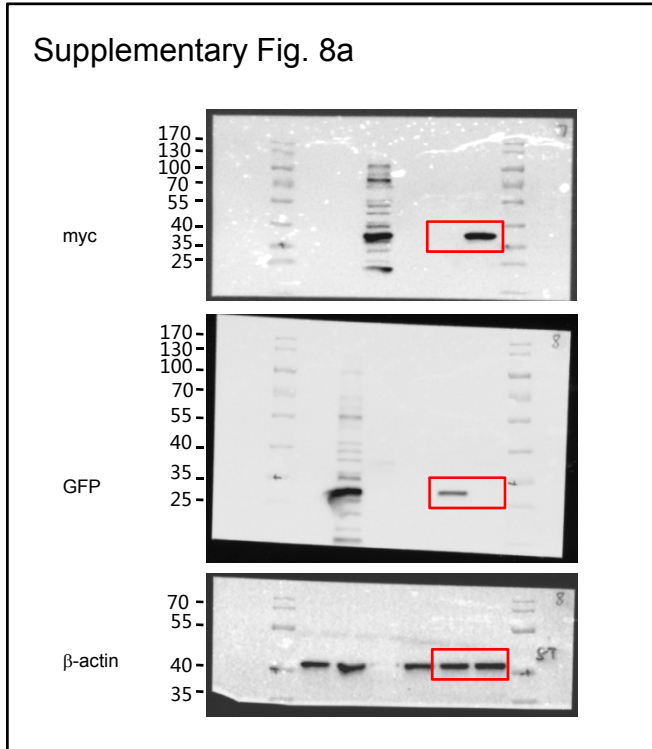

Supplementary Fig. 8b

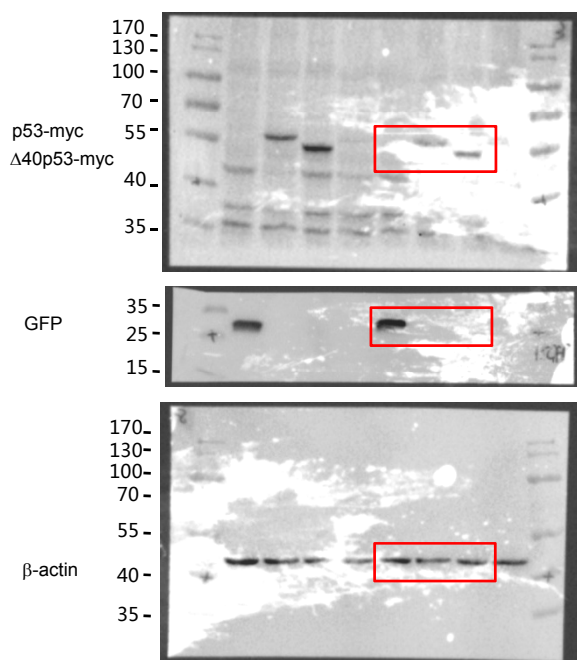

Supplementary Fig. 8d

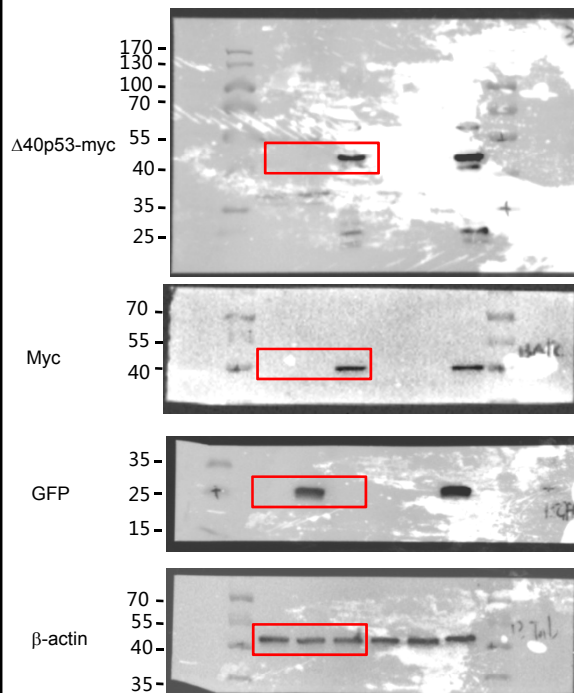

Supplementary Fig. 8c

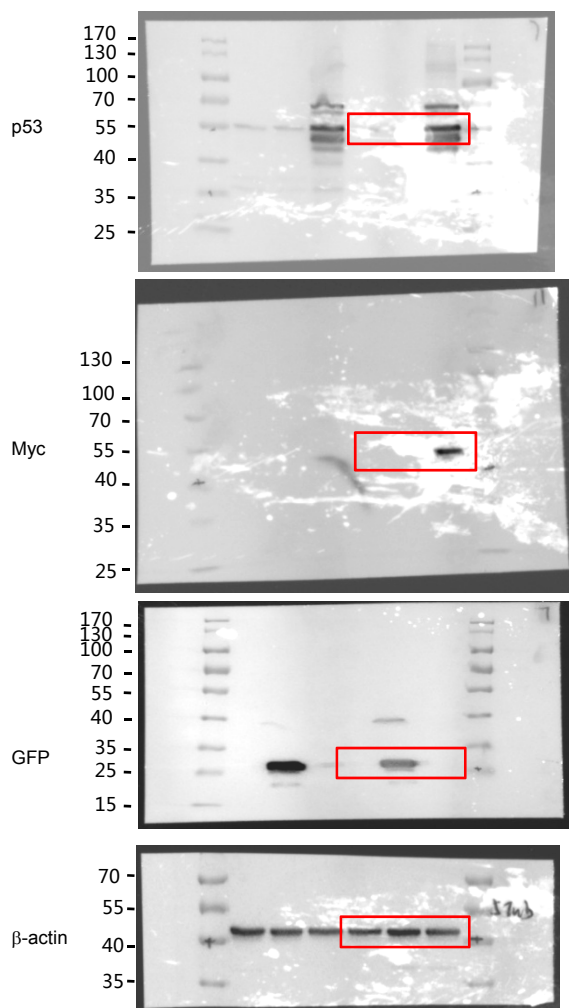

Supplementary Fig. 9b

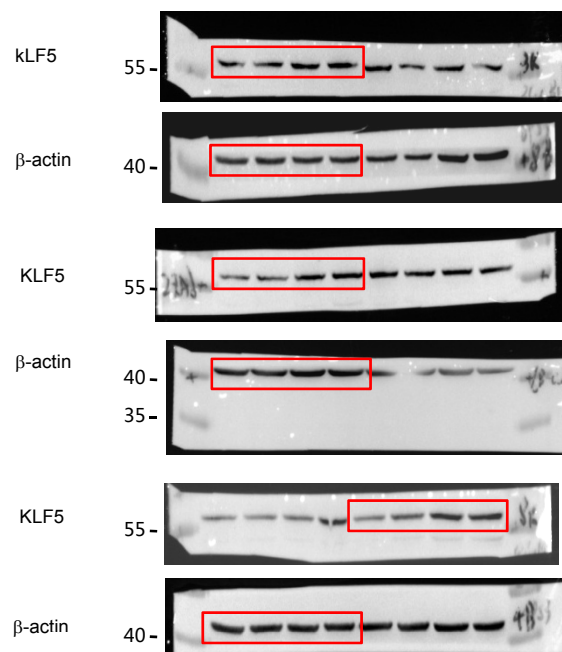

Supplementary Fig. 10a

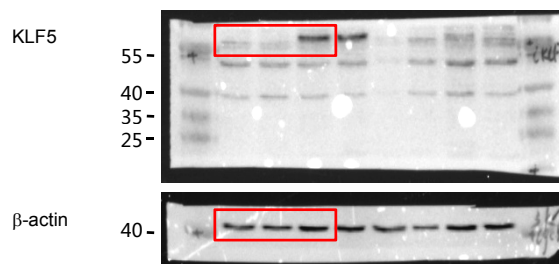

Supplementary Fig. 10b

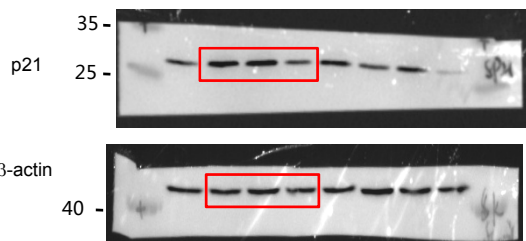

Supplementary Fig 17c

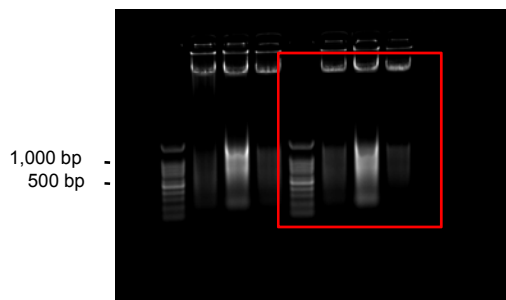

Supplementary Fig 17e

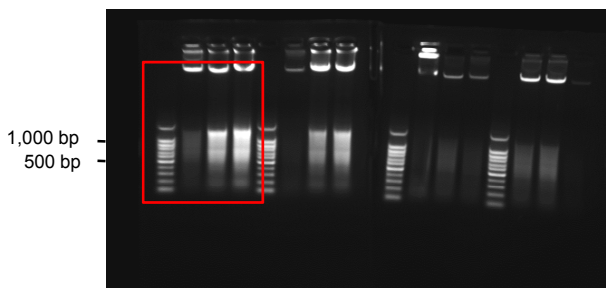

Supplementary Fig. 17h

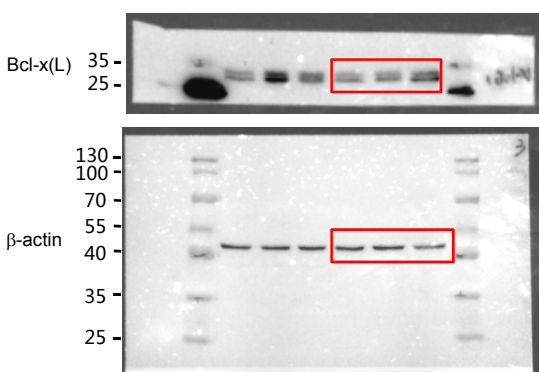

Supplementary Fig. 17j

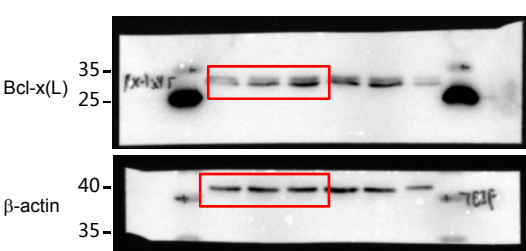

Supplementary Fig. 15

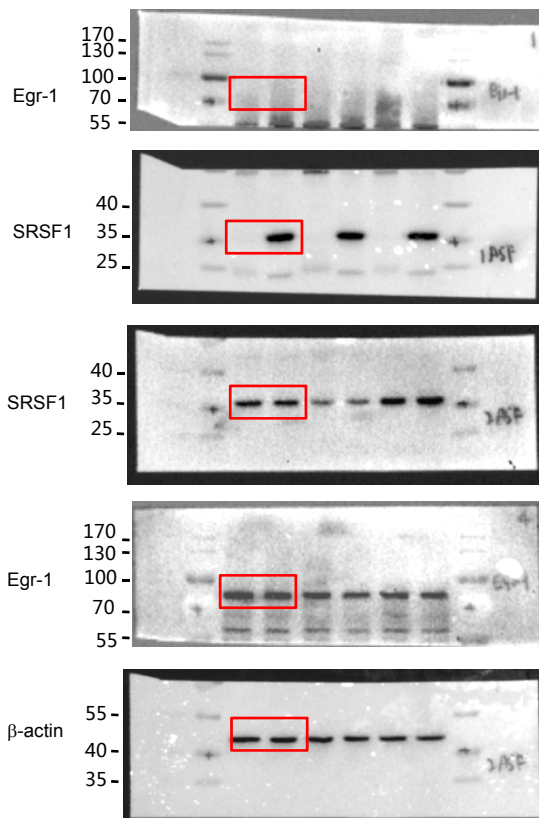

Supplementary Fig. 17l

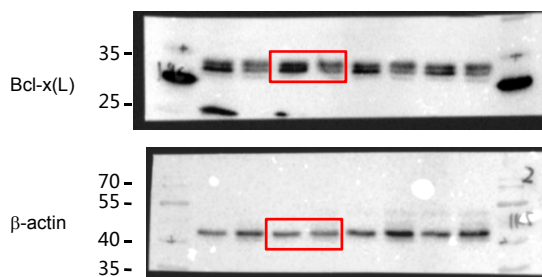

Supplementary Fig. 17n

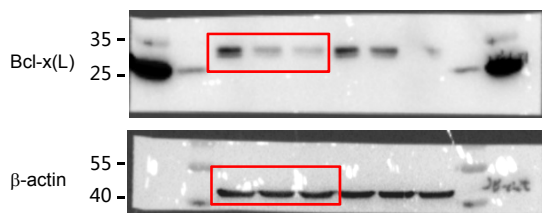

Supplementary Fig. 17p

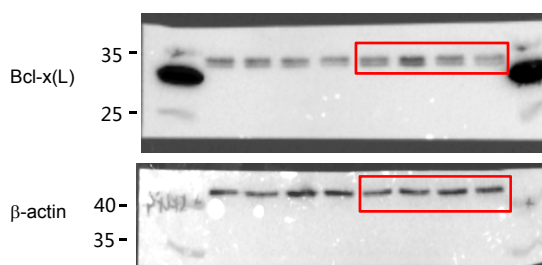

Supplementary Fig. 17q

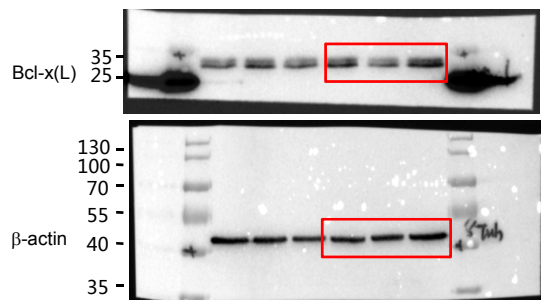

Supplementary Fig. 19a

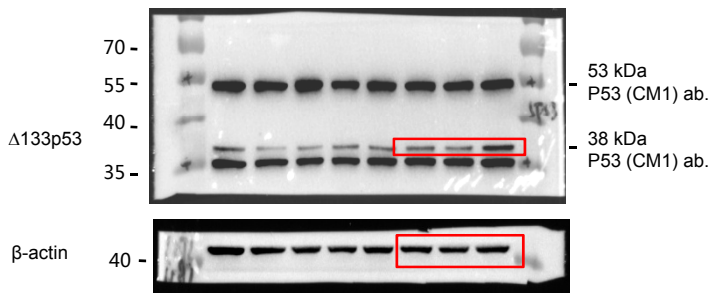

Supplementary Fig. 18a

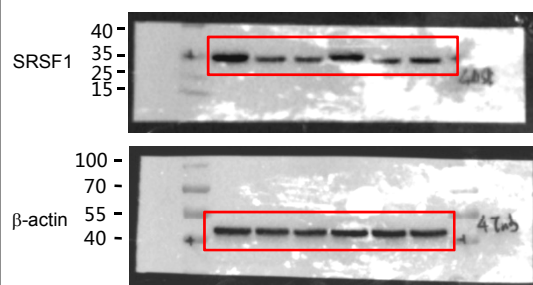

Supplementary Fig. 19c

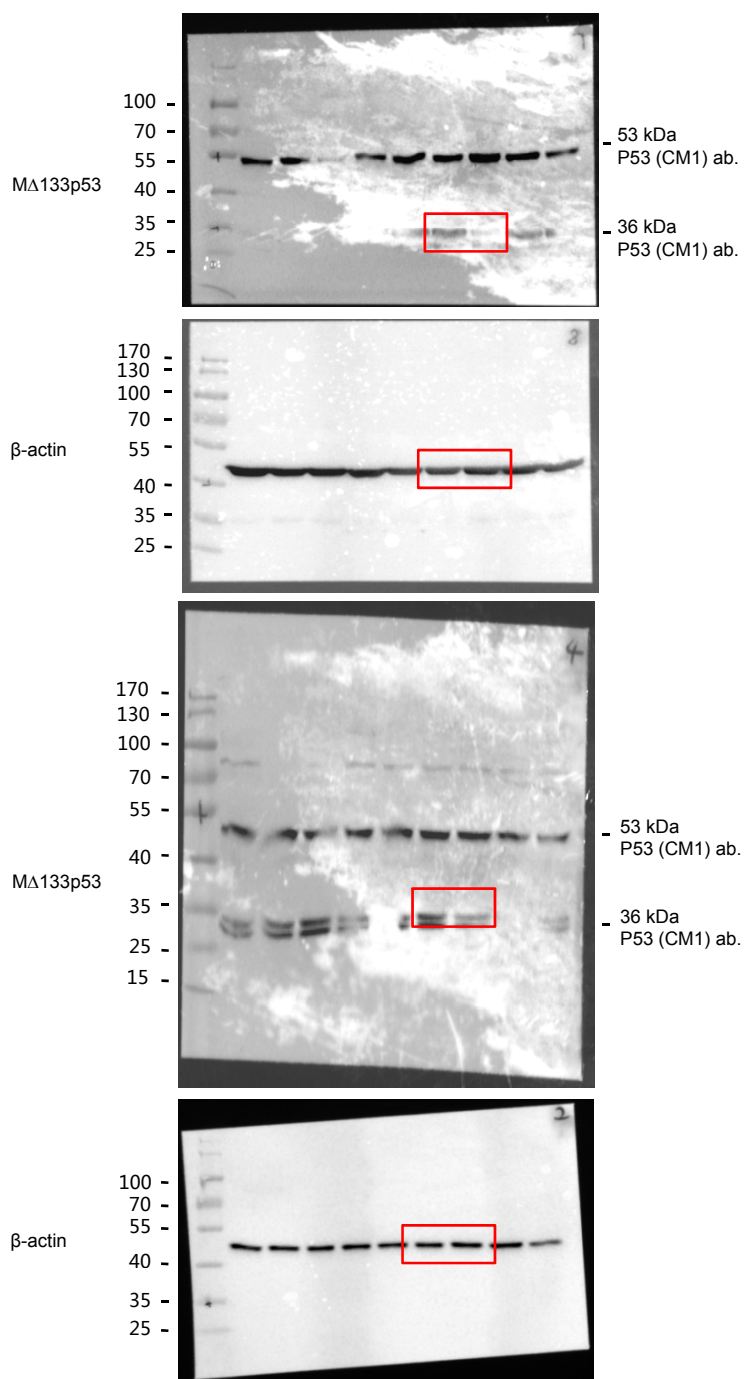

Supplementary Fig. 18b

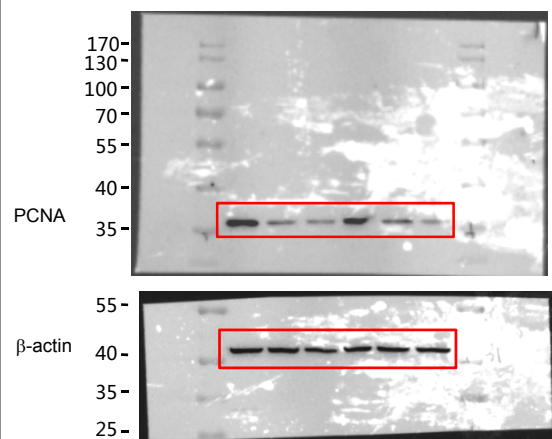



Supplementary Fig. 19b

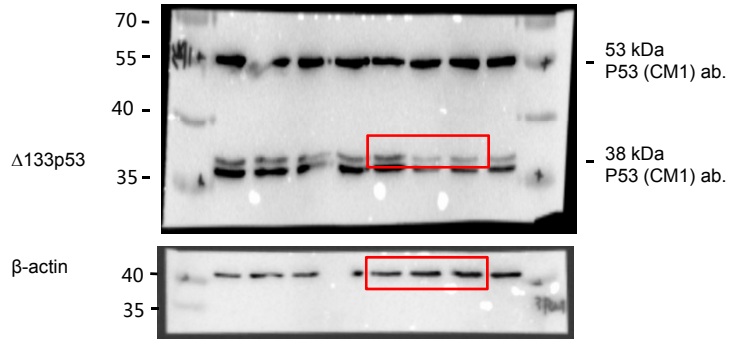

Supplementary Fig. 19d

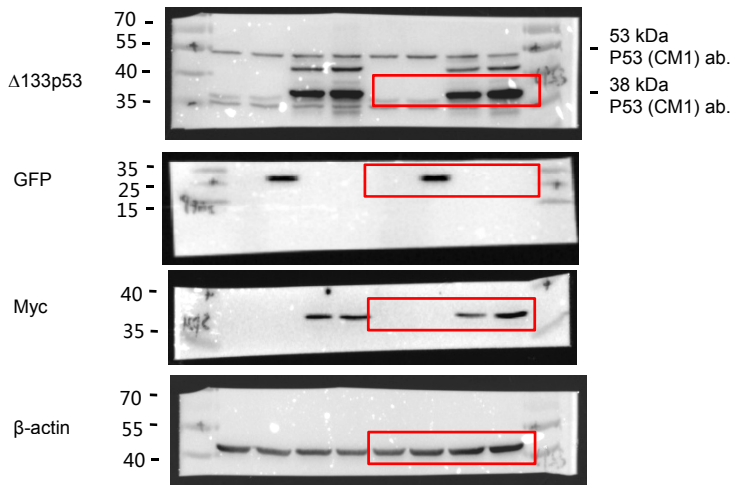

Supplementary Fig. 19e

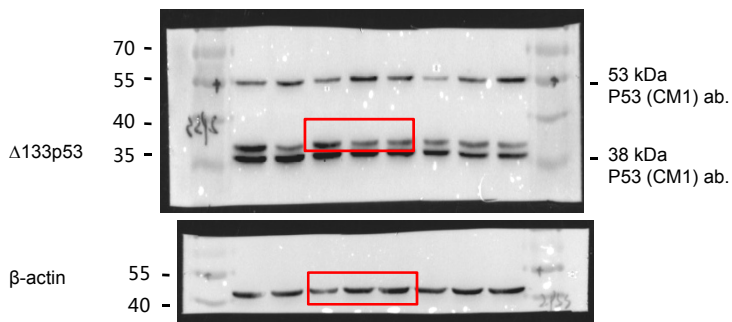

## Supplementary Table 1

### Gene expression profiling of human aortic smooth muscle cells transfected with Ad- $\Delta 133p53$ and Ad-GFP, or treated with Ang II.

| Gene title                                                                                          | Gene symbol | Fold of change<br>( $\Delta 133p53$ /GFP) | Fold of change<br>(Ang II/GFP) |
|-----------------------------------------------------------------------------------------------------|-------------|-------------------------------------------|--------------------------------|
| Adrenomedullin 2                                                                                    | ADM2        | 2.10                                      | 1.79                           |
| Rho GTPase activating protein 26                                                                    | ARHGAP26    | 7.83                                      | 2.53                           |
| Rho/Rac guanine nucleotide exchange factor (GEF) 2                                                  | ARHGEF2     | 1.65                                      | 1.58                           |
| Rho guanine nucleotide exchange factor (GEF) 28                                                     | ARHGEF28    | 4.91                                      | 2.78                           |
| BMP and activin membrane-bound inhibitor homolog (Xenopus laevis)                                   | BAMBI       | 3.04                                      | 2.46                           |
| Calmodulin 2 (phosphorylase kinase, delta)                                                          | CALM2       | 2.11                                      | 1.61                           |
| CAP, adenylate cyclase-associated protein, 2 (yeast)                                                | CAP2        | 4.18                                      | 3.58                           |
| Dimethylarginine dimethylaminohydrolase 1                                                           | DDAH1       | 3.75                                      | 3.75                           |
| Deleted in liver cancer 1                                                                           | DLC1        | 1.54                                      | 1.99                           |
| EPH receptor A5                                                                                     | EPHA5       | 1.50                                      | 2.57                           |
| Fms-related tyrosine kinase 1                                                                       | FLT1        | 2.16                                      | 1.76                           |
| Guanine nucleotide binding protein (G protein), beta polypeptide 4                                  | GNB4        | 1.87                                      | 1.61                           |
| Histone deacetylase 9                                                                               | HDAC9       | 1.58                                      | 2.06                           |
| Inhibin, beta A                                                                                     | INHBA       | 8.38                                      | 5.40                           |
| Intersectin 1 (SH3 domain protein)                                                                  | ITSN1       | 1.67                                      | 1.59                           |
| Kruppel-like factor 5 (intestinal)                                                                  | KLF5        | 3.69                                      | 3.75                           |
| Met proto-oncogene (hepatocyte growth factor receptor)                                              | MET         | 2.68                                      | 1.59                           |
| Myosin, heavy chain 10, non-muscle                                                                  | MYH10       | 1.95                                      | 4.03                           |
| Myosin, light chain 12A, regulatory, non-sarcomeric                                                 | MYL12A      | 2.16                                      | 2.43                           |
| Myosin, light chain 12B, regulatory                                                                 | MYL12B      | 1.53                                      | 1.80                           |
| Myosin, light chain 9, regulatory                                                                   | MYL9        | 1.65                                      | 1.73                           |
| Neural precursor cell expressed, developmentally down-regulated 4-like, E3 ubiquitin protein ligase | NEDD4L      | 1.67                                      | 1.58                           |
| Oxytocin receptor                                                                                   | OXTR        | 6.88                                      | 8.67                           |
| Phosphodiesterase 1C, calmodulin-dependent 70kDa                                                    | PDE1C       | 2.42                                      | 1.63                           |
| Phosphodiesterase 3A, cGMP-inhibited                                                                | PDE3A       | 1.55                                      | 1.58                           |
| Retinol dehydrogenase 10 (all-trans)                                                                | RDH10       | 2.01                                      | 6.47                           |
| Regulator of G-protein signaling 4                                                                  | RGS4        | 6.28                                      | 1.82                           |
| Sodium channel, voltage-gated, type III, alpha subunit                                              | SCN3A       | 1.87                                      | 2.87                           |
| Syndecan 2                                                                                          | SDC2        | 1.63                                      | 1.90                           |
| Sema domain, seven thrombospondin repeats (type 1)                                                  | SEMA5A      | 1.45                                      | 3.12                           |
| Serpin peptidase inhibitor, clade E (nexin, plasminogen activator inhibitor type 1), member 1       | SERPINE1    | 6.06                                      | 2.49                           |
| SMAD specific E3 ubiquitin protein ligase 2                                                         | SMURF2      | 1.87                                      | 1.53                           |
| Sphingosine kinase 1                                                                                | SPHK1       | 2.52                                      | 2.04                           |
| Transforming growth factor, beta receptor 1                                                         | TGFBR1      | 2.18                                      | 1.94                           |
| Thrombospondin 1                                                                                    | THBS1       | 2.03                                      | 1.97                           |
| Tribbles homolog 3 (Drosophila)                                                                     | TRIB3       | 6.69                                      | 2.46                           |
| Transient receptor potential cation channel, subfamily C, member 4                                  | TRPC4       | 3.30                                      | 3.06                           |
| Transient receptor potential cation channel, subfamily C, member 6                                  | TRPC6       | 3.21                                      | 3.30                           |
| Vascular endothelial growth factor C                                                                | VEGFC       | 1.50                                      | 1.50                           |

## Supplementary Table 2

### Antibodies information

| Antibodies name | Products information                                                                                                                                                                                                                                                                            | Working concentration                                     |
|-----------------|-------------------------------------------------------------------------------------------------------------------------------------------------------------------------------------------------------------------------------------------------------------------------------------------------|-----------------------------------------------------------|
| SRSF1           | Invitrogen, 32-4500; recognizes the first 97 amino acids of SRSF1                                                                                                                                                                                                                               | 1:1,000 for western blots                                 |
| SRSF1           | Santa Cruz, sc-33652                                                                                                                                                                                                                                                                            | 1:200 for immunohistochemistry                            |
| SRSF1           | Abcam, ab129108 for Fig. 1b                                                                                                                                                                                                                                                                     | 1:200 for immunofluorescence                              |
| SM-a-actin      | Abcam, ab5694 for Fig. 1b                                                                                                                                                                                                                                                                       | 1:200 for immunofluorescence                              |
| PCNA            | Cell Signaling Technology, 2586; recognizes the protein region within the amino acid residues 111–1251                                                                                                                                                                                          | 1:200 for immunohistochemistry, 1:1,000 for western blots |
| p21             | Cell Signaling Technology, 2947                                                                                                                                                                                                                                                                 | 1:1,000 for western blots                                 |
| EGR1            | Cell Signaling Technology, 4153                                                                                                                                                                                                                                                                 | 1:100 for immunoprecipitation, 1:1,000 for western blots  |
| GFP             | Cell Signaling Technology, 2955                                                                                                                                                                                                                                                                 | 1:1,000 for western blots                                 |
| Myc             | Sigma, SAb4700447                                                                                                                                                                                                                                                                               | 1:100 for immunoprecipitation, 1:1,000 for western blots  |
| p53(CM1)        | Vector Laboratories, VP-P955; a rabbit polyclonal antibody raised against recombinant full-length human p53 protein that recognizes all p53 isoforms, in which $\Delta 133p53\beta$ and $\Delta 133p53\gamma$ are weakly recognized as these isoforms have lost most immunogenic domains of p53 | 1:1,000 for western blots                                 |
| $\beta$ -actin  | Sigma, A1978                                                                                                                                                                                                                                                                                    | 1:1,000 for western blots                                 |
| KLF5            | Gene-Tex, GTX103289                                                                                                                                                                                                                                                                             | 1:1,000 for western blots                                 |
| Bcl-xL          | Cell Signaling Technology, 2762                                                                                                                                                                                                                                                                 | 1:1,000 for western blots                                 |
| eIF-5           | Santa Cruz, sc282                                                                                                                                                                                                                                                                               | 1:1,000 for western blots                                 |

**Supplementary Table 3****Primers for real-time PCR**

| <b>Genes</b>          | <b>Sense primers (5'-3')</b> | <b>Antisense primers (5'-3')</b> |
|-----------------------|------------------------------|----------------------------------|
| h18S                  | CAGCCACCCGAGATTGAGCA         | TAGTAGCGACGGGCGGTGTG             |
| Human SRSF1           | TCCAGACATCCGAACCAA           | TACCCATCGTAATCATAGCC             |
| Human KLF5            | AGCAGCAATGGACACTCTT          | GCCTTCCCAGGTACACTT               |
| Human p21             | GGAAGACCATGTGGACCTGT         | GGCGTTTGGAGTGGTAGAAA             |
| Human $\Delta$ 133p53 | ACTCTGTCTCCTTCCTCTTCCTACAG   | GTGTGGAATCAACCCACAGCT            |
| Human TAp53           | CAGCCAAGTCTGTGACTTGCA        | GTGTGGAATCAACCCACAGCT            |
| Human $\Delta$ 40p53  | TGAGTGGATCCATTGGAAGG         | GTCTGAAAGACAAGAGCAGAAAAG         |
| Human Bcl-xL          | CTGACAGTGAATCTGATGA          | GACAAGAATGCCAAGTTAG              |
| m18S                  | GGAAGGGCACCACCAGGAGT         | GCAGCCCCGGACATCTAAG              |
| Mouse SRSF1           | GTGGAAGCTGGCAGGACTTA         | AGGCAGTTTCTCCCTCGTGA             |
| Mouse KLF5            | GGAAGTCCCGATAGACAAGC         | GCGAATTAAGTGGCAGAGTG             |
| Mouse Bcl-xL          | CAGCGGAGAGTTAATGTT           | AGGCAATGACAATCTGAG               |
| Mouse p21             | TGGGCATGTCAGAAGTCTCG         | CTCGCAGCTTTCCAATGCAC             |
| r18S                  | GGAAGGGCACCACCAGGAGT         | TGCAGCCCCGGACATCTAAG             |
| Rat SRSF1             | CTCCGAGTGGAAGCTGGCAGGACT     | CACCAGTGCCATCTCGGTAAACA          |
| Rat KLF5              | TTGAAGCTGCAGTATGCCTG         | CTGAGGCACTGTCTCGTCTG             |
| Rat Bcl-xL            | CAGTGGAGAGCTAATGTT           | AGGCGATGACAATCTGAG               |
| Rat p21               | CAAAGTATGCCGTCGTCTGTTC       | TCAAAGTTCCACCGTTTCTCG            |

**Supplementary Table 4**

**Sequences of siRNAs against SRSF1,  $\Delta$ 133p53, KLF5, and EGR1**

|                       |        |                   |                           |
|-----------------------|--------|-------------------|---------------------------|
| Human SRSF1           | siRNA1 | Sense (5'-3')     | GCAGAUGCAGUAGGCGUAA       |
|                       |        | Antisense (5'-3') | UUACGCCUACUGCAUCUGC       |
|                       | siRNA2 | Sense (5'-3')     | GCAGAGAGCAGUAAUCCAA       |
|                       |        | Antisense (5'-3') | UUGGAUUACUGCUCUCUGC       |
| Human $\Delta$ 133p53 | siRNA1 | Sense (5'-3')     | UGUUCACUUGUGCCCUGACUUUCAA |
|                       |        | Antisense (5'-3') | UUGAAAGUCAGGGCACAAGUGAACA |
|                       | siRNA2 | Sense (5'-3')     | CUUGUGCCCUGACUUUCAATT     |
|                       |        | Antisense (5'-3') | UUGAAAGUCAGGGCACAAGTT     |
| Human KLF5            | siRNA1 | Sense (5'-3')     | GCAGACUGCAGUGAAACAA       |
|                       |        | Antisense (5'-3') | UUGUUUCACUGCAGUCUGC       |
|                       | siRNA2 | Sense (5'-3')     | GCAUCCACUACUGCGAUUA       |
|                       |        | Antisense (5'-3') | UAAUCGCAGUAGUGGAUGC       |
| Human EGR1            | siRNA1 | Sense (5'-3')     | CCAACAGUGGCAACACCUU       |
|                       |        | Antisense (5'-3') | AAGGUGUUGCCACUGUUGG       |
|                       | siRNA2 | Sense (5'-3')     | GCCUAGUGAGCAUGACCAA       |
|                       |        | Antisense (5'-3') | GCCUAGUGAGCAUGACCAA       |
| Human PCNA            | siRNA1 | Sense (5'-3')     | ACGCGGATACCTTGGCGCTAGTATT |
|                       |        | Antisense (5'-3') | UUTUCTUGCGCCUUGGTUTCCGCGT |
|                       | siRNA2 | Sense (5'-3')     | CCAGGAGAAAGTTTCAGACTATGAA |
|                       |        | Antisense (5'-3') | TTCUTUGTGTGUUUCTTTCTCCTGG |

## Supplementary Table 5

### ChIP-PCR primers for EGR1 binding peaks

| Genes                    | Sense primers (5'-3') | Antisense primers (5'-3') |
|--------------------------|-----------------------|---------------------------|
| P1 (nt-2722 to nt -2577) | CCACTGCCTCCTTCAAAC    | CTTAGTCACTGGGCAACAC       |
| P2 (nt-105 to nt -10)    | TCTCCACCCTAATTCCC     | GTTTGTACACAACCTTCTCTG     |
| P3 (nt-410 to nt -558)   | GAGGAGTCCACCCGAAA     | TGCTCAGCACCCCTTGTA        |
| P4 (nt-1475 to nt -1576) | GCAGCCGAATTAGAGCAA    | TCCTTGGGACAGGCTAAA        |

### Supplementary Table 6

#### Primers for amplification of human $\Delta 133p53$ isoforms by RT-PCR (nested PCR)

| Primers name          | 5'-3' sequence               |
|-----------------------|------------------------------|
| N1 $\Delta$ 133(F9)   | TAGACGCCAACTCTCTCTAG         |
| N1 $\Delta$ 133(R9)   | GACGCACACCTATTGCAAGCAAGGGTTC |
| N2 $\Delta$ 133(F10)  | CTAGTGGGTTGCAGGAGGTGCTTACAC  |
| N2 $\Delta$ 133(R10)  | ATGTCAGTCTGAGTCAGGCCCTTCTGTC |
| N2 $\Delta$ 133b(F11) | CTAGTGGGTTGCAGGAGGTGCTTACAC  |
| N2 $\Delta$ 133b(R11) | TTTGAAAGCTGGTCTGGTCCTGA      |
| N2 $\Delta$ 133g(F12) | CTAGTGGGTTGCAGGAGGTGCTTACAC  |
| N2 $\Delta$ 133g(R12) | TCGTAAGTCAAGTAGCATCTGAAGG    |

**Supplementary Table 7****Primers for quantitative amplification of human p53 isoforms by RT-qPCR**

| <b>Primers name</b> | <b>5'-3' sequence</b>      |
|---------------------|----------------------------|
| Δ133 (I4) F3        | ACTCTGTCTCCTTCCTCTTCCTACAG |
| Δ133 (E5) R3        | GTGTGGAATCAACCCACAGCT      |
| p53alpha (E9) F4    | AACCACTGGATGGAGAATATTTAC   |
| p53alpha (E10) R4   | CAGCTCTCGGAACATCTCGAA      |
| p53beta (E9) F5     | AACCACTGGATGGAGAATATTTAC   |
| p53beta (E9b) R5    | TCATAGAACCATTTTCATGCTCTCTT |
| p53gamma (E9) F6    | AACCACTGGATGGAGAATATTTAC   |
| p53gamma (E9g) R6   | TCAACTTACGACGAGTTTATCAGGAA |
